# Supplementary material for: The peripheral blood proteome signature of idiopathic pulmonary fibrosis is distinct from normal and is associated with novel immunological processes
Source: PubMed Central journal article supplement (PMC5404506; doi:10.1038/srep46560), 2017-04-25
Supplement: srep46560-s1.pdf [file srep46560-s1.pdf]

The peripheral blood proteome signature of idiopathic pulmonary fibrosis is distinct from normal and is associated with novel immunological processes

\*David N. O'Dwyer<sup>1†</sup>, Katy C. Norman<sup>2†</sup>, Meng Xia<sup>3</sup>, Yong Huang<sup>4</sup>, Stephen J. Gurczynski<sup>1</sup>, Shanna L. Ashley<sup>5</sup>, Eric S. White<sup>1</sup>, Kevin R. Flaherty<sup>1</sup>, Fernando J. Martinez<sup>6</sup>, Susan Murray<sup>3</sup>, Imre Noth<sup>4</sup>, Kelly B. Arnold<sup>2,#</sup> and Bethany B. Moore<sup>1,7,#</sup>

**Table S1 Study population demographics**

|                       | IPF          | Normal controls | P value* |
|-----------------------|--------------|-----------------|----------|
| Mean age in yrs. (SD) | 64.56 (7.74) | 69.29 (10.12)   | 0.0257   |
| Male No. (%)          | 41 (68.33)   | 15 (71.43)      | 0.7916   |
| Smoking status        |              |                 |          |
| Never                 | 19 (31.66)   | N/A             | –        |
| Ex                    | 40 (66.66)   | N/A             | –        |
| Current               | 1 (1.66)     | N/A             | –        |

\*Students t-test and Pearson  $\chi^2$  squared test respectively. SD: standard deviation

**Table S2 List of relevant co-morbidities and their frequencies with the COMET IPF patient cohort**

| <b>Co-morbidity</b>  | <b>Freq (N=60) (%)</b> |
|----------------------|------------------------|
| CAD                  |                        |
| Yes                  | 7 (11.67)              |
| No                   | 53 (88.33)             |
| MI                   |                        |
| Yes                  | 2 (3.33)               |
| No                   | 58 (96.67)             |
| Lung Cancer          |                        |
| Yes                  | 1 (1.67)               |
| No                   | 59 (98.33)             |
| Other Cancer         |                        |
| Yes                  | 5 (8.33)               |
| No                   | 55 (91.67)             |
| GERD                 |                        |
| Yes                  | 34 (56.67)             |
| No                   | 25 (41.67)             |
| Unknown              | 1 (1.67)               |
| OSA                  |                        |
| Yes                  | 12 (20.00)             |
| No                   | 48 (80.00)             |
| Pulm HTN             |                        |
| Yes                  | 4 (6.67)               |
| No                   | 55 (91.67)             |
| Unknown              | 1 (1.67)               |
| Emphysema/Bronchitis |                        |
| Yes                  | 1 (1.67)               |
| No                   | 58 (96.67)             |
| Unknown              | 1 (1.67)               |

CAD-coronary artery disease: MI – myocardial infarction: GERD – gastroesophageal reflux disease: OSA – obstructive sleep apnea: Pulm HTN – pulmonary hypertension.

**Table S3****List of upregulated proteins in the IPF peripheral proteome compared to control**

| Protein                                                    | UniProt ID     | Gene ID     |
|------------------------------------------------------------|----------------|-------------|
| Afamin                                                     | P43652         | AFM         |
| Aflatoxin B1 aldehyde reductase member 2                   | O43488         | AKR7A2      |
| AH receptor-interacting protein                            | O00170         | AIP         |
| Alpha-soluble NSF attachment protein                       | P54920         | NAPA        |
| Aminoacylase-1                                             | Q03154         | ACY1        |
| Apolipoprotein A-I                                         | P02647         | APOA1       |
| Beta-Ala-His dipeptidase                                   | Q96KN2         | CNDP1       |
| Bone morphogenetic protein 1                               | P13497         | BMP1        |
| C5a anaphylatoxin                                          | P01031         | C5          |
| Cathepsin B                                                | P07858         | CTSB        |
| cGMP-specific 3',5'-cyclic phosphodiesterase               | O76074         | PDE5A       |
| Chloride intracellular channel protein 1                   | O00299         | CLIC1       |
| Coagulation Factor V                                       | P12259         | F5          |
| Complement C1r subcomponent                                | P00736         | C1R         |
| Complement C4                                              | P0C0L4         | C4A         |
| Cyclin-dependent kinase 8:Cyclin-C complex                 | P49336, P24863 | CDK8 CCNC   |
| Dual 3',5'-cyclic-AMP and -GMP phosphodiesterase 11A       | Q9HCR9         | PDE11A      |
| Dual specificity mitogen-activated protein kinase kinase 4 | P45985         | MAP2K4      |
| Endothelin-converting enzyme 1                             | P42892         | ECE1        |
| Fibronectin                                                | P02751         | FN1         |
| Glyceraldehyde-3-phosphate dehydrogenase                   | P04406         | GAPDH       |
| Glycogen synthase kinase-3 alpha/beta                      | P49840, P49841 | GSK3A GSK3B |
| Growth hormone receptor                                    | P10912         | GHR         |
| Growth/differentiation factor 11                           | O95390         | GDF11       |
| GTP-binding nuclear protein Ran                            | P62826         | RAN         |
| Intercellular adhesion molecule 5                          | Q9UMF0         | ICAM5       |
| MAP kinase-activated protein kinase 2                      | P49137         | MAPKAPK2    |

|                                                                                                                                                   |                |               |
|---------------------------------------------------------------------------------------------------------------------------------------------------|----------------|---------------|
| Matrilysin                                                                                                                                        | P09237         | MMP7          |
| Methionine aminopeptidase 2                                                                                                                       | P50579         | METAP2        |
| Nascent polypeptide-associated complex subunit alpha                                                                                              | Q13765         | NACA          |
| Peptidyl-prolyl cis-trans isomerase D                                                                                                             | Q08752         | PPID          |
| Phosphatidylinositol 4,5-bisphosphate 3-kinase catalytic subunit alpha isoform:<br>Phosphatidylinositol 3-kinase regulatory subunit alpha complex | P42336, P27986 | PIK3CA PIK3R1 |
| Plasma serine protease inhibitor                                                                                                                  | P05154         | SERPINA5      |
| Proprotein convertase subtilisin/kexin type 7                                                                                                     | Q16549         | PCSK7         |
| Protein kinase C alpha type                                                                                                                       | P17252         | PRKCA         |
| Protein kinase C beta type (splice variant beta-II)                                                                                               | P05771         | PRKCB         |
| Proto-oncogene tyrosine-protein kinase Src                                                                                                        | P12931         | SRC           |
| P-Selectin                                                                                                                                        | P16109         | SELP          |
| Pyruvate kinase PKM                                                                                                                               | P14618         | PKM2          |
| Ras-related C3 botulinum toxin substrate 1                                                                                                        | P63000         | RAC1          |
| Ribosome maturation protein SBDS                                                                                                                  | Q9Y3A5         | SBDS          |
| Small glutamine-rich tetratricopeptide repeat-containing protein alpha                                                                            | O43765         | SGTA          |
| Sorting nexin-4                                                                                                                                   | O95219         | SNX4          |
| Sphingosine kinase 1                                                                                                                              | Q9NYA1         | SPHK1         |
| Tumor necrosis factor ligand superfamily member 13B                                                                                               | Q9Y275         | TNFSF13B      |
| Tyrosine-protein kinase BTK                                                                                                                       | Q06187         | BTK           |
| Tyrosine-protein kinase CSK                                                                                                                       | P41240         | CSK           |
| Tyrosine-protein kinase Tec                                                                                                                       | P42680         | TEC           |

---

Uniprot Accession ID listed. Detailed descriptions of proteins available at <http://www.uniprot.org/>

N=48 proteins

\*Measured in combination

**Table S4** List of downregulated proteins in the IPF peripheral proteome compared to control

| Protein                                                           | UniProt ID | Gene ID |
|-------------------------------------------------------------------|------------|---------|
| Allograft inflammatory factor 1                                   | P55008     | AIF1    |
| Alcohol dehydrogenase [NADP(+)]                                   | P14550     | AKR1A1  |
| Alkaline phosphatase, tissue-nonspecific isozyme                  | P05186     | ALPL    |
| Annexin A1                                                        | P04083     | ANXA1   |
| Annexin A2                                                        | P07355     | ANXA2   |
| Complement C3                                                     | P01024     | C3      |
| Complement C3b, inactivated                                       | P01024     | C3      |
| Complement C4b                                                    | P0C0L5     | C4B     |
| Carbonic anhydrase 3                                              | P07451     | CA3     |
| Calcium/calmodulin-dependent protein kinase type II subunit beta  | Q13554     | CAMK2B  |
| Calcium/calmodulin-dependent protein kinase type II subunit delta | Q13557     | CAMK2D  |
| Macrophage-capping protein                                        | P40121     | CAPG    |
| Caspase-10                                                        | Q92851     | CASP10  |
| Calpastatin                                                       | P20810     | CAST    |
| C-C motif chemokine 14                                            | Q16627     | CCL14   |
| C-C motif chemokine 23                                            | P55773     | CCL23   |
| Cyclin-dependent kinase inhibitor 1B                              | P46527     | CDKN1B  |
| Cryptic protein                                                   | P0CG37     | CFC1    |
| Cofilin-1                                                         | P23528     | CFL1    |
| Chymase                                                           | P23946     | CMA1    |
| C-reactive protein                                                | P02741     | CRP     |
| Macrophage colony-stimulating factor 1                            | P09603     | CSF1    |
| Granulocyte-macrophage colony-stimulating factor                  | P04141     | CSF2    |
| Cystatin-C                                                        | P01034     | CST3    |
| Cathepsin S                                                       | P25774     | CTSS    |
| C-X-C motif chemokine 11                                          | O14625     | CXCL11  |
| Interleukin-8                                                     | P10145     | CXCL8   |

| Protein                                            | UniProt ID | Gene ID   |
|----------------------------------------------------|------------|-----------|
| Discoidin domain-containing receptor 2             | Q16832     | DDR2      |
| Eukaryotic translation initiation factor 4 gamma 2 | P78344     | EIF4G2    |
| Eukaryotic translation initiation factor 5         | P55010     | EIF5      |
| Eukaryotic translation initiation factor 5A-1      | P63241     | EIF5A     |
| Ephrin type-A receptor 2                           | P29317     | EPHA2     |
| Tissue Factor                                      | P13726     | F3        |
| Ficolin-1                                          | O00602     | FCN1      |
| Tyrosine-protein kinase Fyn                        | P06241     | FYN       |
| Growth/differentiation factor 5                    | P43026     | GDF5      |
| Aspartate aminotransferase, cytoplasmic            | P17174     | GOT1      |
| Glucose-6-phosphate isomerase                      | P06744     | GPI       |
| Glutathione S-transferase P                        | P09211     | GSTP1     |
| Histone H2A.z                                      | P0C055     | H2AFZ     |
| Hepatitis A virus cellular receptor 2              | Q8TDQ0     | HAVCR2    |
| Hepatoma-derived growth factor-related protein 2   | Q7Z4V5     | HDGFRP2   |
| Histone H1.2                                       | P16403     | HIST1H1C  |
| High mobility group protein B1                     | P09429     | HMGB1     |
| Heme oxygenase 2                                   | P30519     | HMOX2     |
| Heterogeneous nuclear ribonucleoproteins A2/B1     | P22626     | HNRNPA2B1 |
| Heterogeneous nuclear ribonucleoprotein A/B        | Q99729     | HNRNPAB   |
| Estradiol 17-beta-dehydrogenase 1                  | P14061     | HSD17B1   |
| Heat shock 70 kDa protein 1A/1B                    | P08107     | HSPA1A    |
| Serine protease HTRA2, mitochondrial               | O43464     | HTRA2     |
| ICOS ligand                                        | O75144     | ICOSLG    |
| Insulin-like growth factor-binding protein 1       | P08833     | IGFBP1    |
| Insulin-like growth factor-binding protein 2       | P18065     | IGFBP2    |
| Interleukin-16                                     | Q14005     | IL16      |
| Interleukin-2                                      | P60568     | IL2       |

| Protein                                                    | UniProt ID     | Gene ID     |
|------------------------------------------------------------|----------------|-------------|
| Interleukin-3                                              | P08700         | IL3         |
| Integrin alpha-I: beta-1 complex                           | P56199, P05556 | ITGA1 ITGB1 |
| Killer cell immunoglobulin-like receptor 2DL4              | Q99706         | KIR2DL4     |
| Importin subunit alpha-1                                   | P52292         | KPNA2       |
| Lipopolysaccharide-binding protein                         | P18428         | LBP         |
| Neutrophil gelatinase-associated lipocalin                 | P80188         | LCN2        |
| Lactotransferrin                                           | P02788         | LTF         |
| Dual specificity mitogen-activated protein kinase kinase 1 | Q02750         | MAP2K1      |
| Dual specificity mitogen-activated protein kinase kinase 2 | P36507         | MAP2K2      |
| Mitogen-activated protein kinase 13                        | O15264         | MAPK13      |
| Myoglobin                                                  | P02144         | MB          |
| Matrix metalloproteinase-9                                 | P14780         | MMP9        |
| Myeloperoxidase                                            | P05164         | MPO         |
| Moesin                                                     | P26038         | MSN         |
| Nicotinamide phosphoribosyltransferase                     | P43490         | NAMPT       |
| NudC domain-containing protein 3                           | Q8IVD9         | NUDCD3      |
| Oxidized low-density lipoprotein receptor 1                | P78380         | OLR1        |
| Protein DJ-1                                               | Q99497         | PARK7       |
| Phosphatidylethanolamine-binding protein 1                 | P30086         | PEBP1       |
| Prefoldin subunit 5                                        | Q99471         | PFDN5       |
| Phosphoglycerate mutase 1                                  | P18669         | PGAM1       |
| Peptidoglycan recognition protein 1                        | O75594         | PGLYRP1     |
| Elafin                                                     | P19957         | PI3         |
| Phospholipase A2, membrane associated                      | P14555         | PLA2G2A     |
| Urokinase plasminogen activator surface receptor           | Q03405         | PLAUR       |
| NADPH--cytochrome P450 reductase                           | P16435         | POR         |
| Myeloblastin                                               | P24158         | PRTN3       |
| Proteasome subunit alpha type-2                            | P25787         | PSMA2       |



| Protein                                              | UniProt ID | Gene ID  |
|------------------------------------------------------|------------|----------|
| Prostaglandin G/H synthase 2                         | P35354     | PTGS2    |
| Tyrosine-protein phosphatase non-receptor type 1     | P18031     | PTPN1    |
| Tyrosine-protein phosphatase non-receptor type 11    | Q06124     | PTPN11   |
| Tyrosine-protein phosphatase non-receptor type 6     | P29350     | PTPN6    |
| RNA-binding protein 39                               | Q14498     | RBM39    |
| Resistin                                             | Q9HD89     | RETN     |
| Ubiquitin                                            | P62979     | RPS27A   |
| Ubiquitin+1, truncated mutation for UbB              | P62979     | RPS27A   |
| 40S ribosomal protein S7                             | P62081     | RPS7     |
| Protein S100-A9                                      | P06702     | S100A9   |
| Serum amyloid A-1 protein                            | P0DJI8     | SAA1     |
| Scavenger receptor class F member 1                  | Q14162     | SCARF1   |
| alpha-1-antichymotrypsin complex                     | P01011     | SERPINA3 |
| Plasma protease C1 inhibitor                         | P05155     | SERPING1 |
| Pulmonary surfactant-associated protein D            | P35247     | SFTPD    |
| SHC-transforming protein 1                           | P29353     | SHC1     |
| Sialic acid-binding Ig-like lectin 14                | Q08ET2     | SIGLEC14 |
| Small nuclear ribonucleoprotein F                    | P62306     | SNRPF    |
| FACT complex subunit SSRP1                           | Q08945     | SSRP1    |
| Heterogeneous nuclear ribonucleoprotein Q            | O60506     | SYNCRIP  |
| Trefoil factor 3                                     | Q07654     | TFF3     |
| Metalloproteinase inhibitor 1                        | P01033     | TIMP1    |
| Tumor necrosis factor receptor superfamily member 1B | P20333     | TNFRSF1B |
| Tumor necrosis factor ligand superfamily member 14   | O43557     | TNFSF14  |
| DNA topoisomerase 1                                  | P11387     | TOP1     |
| Triosephosphate isomerase                            | P60174     | TPI1     |
| SUMO-conjugating enzyme UBC9                         | P63279     | UBE2I    |
| Ubiquitin-conjugating enzyme E2 N                    | P61088     | UBE2N    |

---

| Protein                                                  | UniProt ID | Gene ID |
|----------------------------------------------------------|------------|---------|
| Ubiquitin-fold modifier 1                                | P61960     | UFM1    |
| Vacuolar protein sorting-associated protein VTA1 homolog | Q9NP79     | VTA1    |
| X-ray repair cross-complementing protein 6               | P12956     | XRCC6   |
| Tyrosine-protein kinase Yes                              | P07947     | YES1    |

---

\* P08107 updated as secondary accession to P0DMV8/P0DMV9 (HSPA1A/HSPA1B).

N= 116

**Table S5 List of all significant proteins on analysis of IPF proteome versus healthy**

| Uniprot ID     | Gene ID     | Fold expression | Predicted Linear Model Ratios (IPF/Healthy) | P-values significant after Bonferroni correction | FDR         | Age-adjusted P-values significant after Bonferroni Correction | Age-adjusted FDR |
|----------------|-------------|-----------------|---------------------------------------------|--------------------------------------------------|-------------|---------------------------------------------------------------|------------------|
| P17252         | PRKCA       | 2.844150745     | 2.7443155                                   | 1.36E-14                                         | 0.000194363 | 4.3293E-14                                                    | 0.001000972      |
| P02647         | APOA1       | 1.542341061     | 1.544871222                                 | 1.451E-06                                        | 0.001467444 | 4.2806E-09                                                    | 0.001282799      |
| O95390         | GDF11       | 1.628565596     | 1.608156622                                 | 7.663E-12                                        | 0.000359572 | 1.1845E-07                                                    | 0.000855199      |
| P09237         | MMP7        | 2.654602809     | 2.747872619                                 | 2.054E-18                                        | 0.000126336 | 2.5766E-10                                                    | 0.001720117      |
| P01031         | C5          | 1.654531862     | 1.675076486                                 | 5.828E-07                                        | 0.001282799 | 7.3906E-06                                                    | 0.001681244      |
| P63000         | RAC1        | 1.610302077     | 1.574044262                                 | 1.098E-06                                        | 0.001389699 | 6.2295E-06                                                    | 0.00191448       |
| Q9Y275         | TNFSF13B    | 2.129450761     | 2.191299147                                 | 3.817E-19                                        | 9.71817E-05 | 4.4978E-11                                                    | 0.000272109      |
| P07858         | CTSB        | 1.665079978     | 1.742647874                                 | 3.293E-13                                        | 0.000242954 | 3.113E-11                                                     | 0.000437318      |
| P50579         | METAP2      | 2.400193949     | 2.369123805                                 | 4.876E-10                                        | 0.000515063 | 2.655E-08                                                     | 0.002147716      |
| P00736         | C1R         | 4.387258094     | 4.463494883                                 | 7.042E-22                                        | 5.8309E-05  | 6.7295E-17                                                    | 0.001574344      |
| P13497         | BMP1        | 2.462088383     | 2.418442708                                 | 4.891E-16                                        | 0.000165209 | 4.7633E-14                                                    | 0.002196307      |
| P49336, P24863 | CDK8 CCNC   | 1.642587894     | 1.64618749                                  | 5.658E-19                                        | 0.000116618 | 8.7935E-11                                                    | 0.00292517       |
| P41240         | CSK         | 1.955228256     | 1.939577175                                 | 5.987E-10                                        | 0.000524781 | 2.9947E-06                                                    | 0.001137026      |
| P05154         | SERPINA5    | 2.493816792     | 2.438316738                                 | 4.487E-18                                        | 0.000136054 | 2.0621E-20                                                    | 0.001525753      |
| P49840, P49841 | GSK3A GSK3B | 3.734712707     | 3.634606001                                 | 3.89E-27                                         | 9.71817E-06 | 6.23E-18                                                      | 0.001389699      |
| P42680         | TEC         | 2.558122735     | 2.478830736                                 | 2.333E-16                                        | 0.000145773 | 2.3177E-08                                                    | 0.001156463      |
| P49137         | MAPKAPK2    | 1.868501241     | 1.883819574                                 | 4.897E-08                                        | 0.00090379  | 1.7658E-06                                                    | 0.002400389      |
| O00170         | AIP         | 1.715314482     | 1.675073096                                 | 9.679E-15                                        | 0.000174927 | 6.676E-09                                                     | 0.000719145      |
| P04406         | GAPDH       | 1.669919932     | 1.639169965                                 | 5.773E-06                                        | 0.001856171 | 5.3425E-07                                                    | 0.000942663      |
| Q13765         | NACA        | 2.276481926     | 2.165538354                                 | 3.917E-21                                        | 7.77454E-05 | 6.6077E-12                                                    | 0.00047619       |
| O43765         | SGTA        | 1.859855557     | 1.803317323                                 | 1.199E-08                                        | 0.000767736 | 2.8969E-07                                                    | 0.002001944      |
| O95219         | SNX4        | 2.060637667     | 1.939104225                                 | 7.436E-09                                        | 0.000709427 | 1.9616E-08                                                    | 0.002137998      |
| P02751         | FN1         | 2.058884999     | 2.1387836                                   | 5.309E-12                                        | 0.000340136 | 2.7176E-08                                                    | 0.001059281      |
| O43488         | AKR7A2      | 2.382612119     | 2.339107573                                 | 2.438E-11                                        | 0.000388727 | 1.7054E-07                                                    | 0.00159378       |
| P14618         | PKM2        | 2.372734125     | 2.397160175                                 | 2.892E-13                                        | 0.000233236 | 5.4956E-09                                                    | 0.002254616      |
| P62826         | RAN         | 10.78442484     | 8.501570061                                 | 9.529E-21                                        | 8.74636E-05 | 3.8826E-11                                                    | 0.001467444      |
| P54920         | NAPA        | 2.259133786     | 2.144386113                                 | 1.622E-13                                        | 0.000204082 | 1.6544E-09                                                    | 0.002983479      |
| Q9NYA1         | SPHK1       | 4.924705886     | 4.492447031                                 | 2.931E-21                                        | 6.80272E-05 | 1.0608E-13                                                    | 0.000359572      |

| Uniprot ID     | Gene ID       | Fold expression | Predicted Linear Model Ratios (IPF/Healthy) | P-values significant after Bonferroni correction | FDR         | Age-adjusted P-values significant after |                  |
|----------------|---------------|-----------------|---------------------------------------------|--------------------------------------------------|-------------|-----------------------------------------|------------------|
|                |               |                 |                                             |                                                  |             | Bonferroni Correction                   | Age-adjusted FDR |
| Q16549         | PCSK7         | 2.06801082      | 1.986426465                                 | 5.236E-22                                        | 4.85909E-05 | 6.9419E-12                              | 0.000291545      |
| P12259         | F5            | 1.568462646     | 1.611038214                                 | 1.518E-11                                        | 0.000369291 | 1.0352E-06                              | 0.000349854      |
| O00299         | CLIC1         | 3.059946004     | 2.993311375                                 | 6.309E-12                                        | 0.000349854 | 6.6552E-09                              | 2.91545E-05      |
| Q9UMF0         | ICAM5         | 1.759344079     | 1.804719167                                 | 2.014E-11                                        | 0.000379009 | 1.3082E-07                              | 0.000281827      |
| Q08752         | PPID          | 3.742581674     | 3.511759899                                 | 1.307E-12                                        | 0.000281827 | 3.2523E-06                              | 0.0003207        |
| P45985         | MAP2K4        | 1.747910459     | 1.715622054                                 | 4.992E-09                                        | 0.000680272 | 9.5677E-08                              | 0.000330418      |
| P12931         | SRC           | 3.854282773     | 3.709558785                                 | 1.198E-22                                        | 3.88727E-05 | 1.027E-18                               | 0.000252672      |
| O76074         | PDE5A         | 4.43765169      | 3.978480542                                 | 9.751E-26                                        | 1.94363E-05 | 8.5254E-15                              | 0.000447036      |
| P10912         | GHR           | 1.777326642     | 1.767808273                                 | 1.284E-10                                        | 0.000447036 | 2.1388E-10                              | 0.000728863      |
| Q03154         | ACY1          | 4.904977655     | 4.13058665                                  | 6.462E-13                                        | 0.000272109 | 4.2266E-06                              | 0.000155491      |
| P42336, P27986 | PIK3CA PIK3R1 | 1.595594423     | 1.612386386                                 | 5.423E-19                                        | 0.0001069   | 6.2975E-11                              | 0.001972789      |
| Q06187         | BTK           | 10.44813268     | 9.363373991                                 | 2.252E-24                                        | 2.91545E-05 | 8.0073E-14                              | 0.001068999      |
| Q96KN2         | CNDP1         | 2.772175242     | 2.868771762                                 | 5.328E-13                                        | 0.000262391 | 5.454E-10                               | 0.001127308      |
| Q9Y3A5         | SBDS          | 2.559809181     | 2.525581685                                 | 1.145E-14                                        | 0.000184645 | 8.1077E-10                              | 0.000612245      |
| P16109         | SELP          | 1.755253189     | 1.688921305                                 | 5.013E-11                                        | 0.000398445 | 4.4751E-09                              | 0.001292517      |
| P08649         | C4A C4B       | 2.163849532     | 2.152620093                                 | 2.106E-13                                        | 0.000223518 | 1.7857E-12                              | 0.000894072      |
| P43652         | AFM           | 1.516790465     | 1.509684337                                 | 4.459E-09                                        | 0.000660836 | 1.8907E-10                              | 0.001613217      |
| Q9HCR9         | PDE11A        | 2.693926113     | 2.629765299                                 | 4.46E-10                                         | 0.000505345 | 4.4336E-07                              | 0.000262391      |
| P05771         | PRKCB         | 2.549572043     | 2.527742077                                 | 2.072E-13                                        | 0.0002138   | 1.944E-07                               | 0.000621963      |
| P42892         | ECE1          | 1.496922719     | 1.545032257                                 | 2.628E-08                                        | 0.000864917 | 1.3217E-07                              | 0.002439261      |
| Q9UHD0         | IL19          | 1.536009374     | 1.522027626                                 | 6.889E-08                                        | 0.000942663 | 2.5591E-05                              | 0.001146744      |
| P23280         | CA6           | 2.120863591     | 2.199196968                                 | 8.504E-07                                        | 0.001350826 | 9.6872E-05                              | 0.000242954      |
| Q8N1Q1         | CA13          | 2.14243776      | 2.090315543                                 | 3.449E-08                                        | 0.000874636 | 0.00011986                              | 0.001428571      |
| P07996         | THBS1         | 1.722022566     | 1.66082076                                  | 2.042E-06                                        | 0.001564626 | 0.00124037                              | 0.002954325      |
| Q9NQU5         | PAK6          | 1.78765298      | 1.782944743                                 | 9.87E-07                                         | 0.001379981 | 3.1333E-05                              | 0.001049563      |
| Q8N5S9         | CAMKK1        | 1.689904266     | 1.68676957                                  | 9.496E-07                                        | 0.001370262 | 0.00133575                              | 0.001477162      |
| Q99714         | HSD17B10      | 2.648891087     | 2.544580128                                 | 1.222E-07                                        | 0.001039845 | 0.00027562                              | 0.001234208      |
| Q08209, P63098 | PPP3CA PPP3R1 | 1.996632503     | 2.050362653                                 | 2.685E-07                                        | 0.001175899 | 3.7241E-05                              | 3.88727E-05      |
| P03956         | MMP1          | 1.880033667     | 1.868914014                                 | 6.063E-08                                        | 0.000932945 | 9.6125E-05                              | 0.001448008      |
| P15514         | AREG          | 1.597172106     | 1.537410827                                 | 1.067E-07                                        | 0.000991254 | 6.0986E-05                              | 0.000699708      |

| Uniprot ID     | Gene ID  | Fold expression | Predicted Linear Model Ratios (IPF/Healthy) | P-values significant after Bonferroni correction | FDR         | Age-adjusted P-values significant after |                  |
|----------------|----------|-----------------|---------------------------------------------|--------------------------------------------------|-------------|-----------------------------------------|------------------|
|                |          |                 |                                             |                                                  |             | Bonferroni Correction                   | Age-adjusted FDR |
| P36888         | FLT3     | 1.633132296     | 1.62729439                                  | 1.988E-07                                        | 0.00111759  | 0.00026356                              | 0.000602527      |
| P12277, P06732 | CKB CKM  | 3.424539483     | 2.772971246                                 | 9.364E-09                                        | 0.000748299 | 0.00031418                              | 0.001341108      |
| O75636         | FCN3     | 1.486624762     | 1.505689722                                 | 4.105E-06                                        | 0.001739553 | 0.00219711                              | 0.00877551       |
| O43557         | TNFSF14  | 0.437387768     | 0.433556681                                 | 2.631E-09                                        | 0.000612245 | 3.9442E-15                              | 0.001098154      |
| P62306         | SNRPF    | 0.589209938     | 0.585044542                                 | 3.073E-09                                        | 0.000631681 | 2.0066E-16                              | 0.001671526      |
| P18065         | IGFBP2   | 0.561250316     | 0.560919529                                 | 1.127E-06                                        | 0.001399417 | 8.7262E-10                              | 0.000641399      |
| P14780         | MMP9     | 0.580646533     | 0.581799239                                 | 8.175E-06                                        | 0.001963071 | 6.1719E-07                              | 0.000340136      |
| P05164         | MPO      | 0.66653812      | 0.664052177                                 | 3.288E-07                                        | 0.001195335 | 3.5821E-06                              | 0.000116618      |
| P55010         | EIF5     | 0.264516494     | 0.257394258                                 | 1.575E-10                                        | 0.000466472 | 2.9209E-26                              | 0.00068999       |
| P30519         | HMOX2    | 0.302673799     | 0.309421198                                 | 1.115E-08                                        | 0.000758017 | 2.4311E-15                              | 0.00079689       |
| Q03405         | PLAUR    | 0.714503307     | 0.711668768                                 | 3.972E-06                                        | 0.001729835 | 6.9874E-07                              | 0.000553936      |
| P01024         | C3       | 0.531153018     | 0.521491138                                 | 3.962E-12                                        | 0.0003207   | 6.326E-28                               | 0.000631681      |
| P16435         | POR      | 0.193507136     | 0.203838807                                 | 1.288E-07                                        | 0.001049563 | 1.2994E-16                              | 0.001554908      |
| P43026         | GDF5     | 0.527925041     | 0.526377553                                 | 1.399E-07                                        | 0.001098154 | 5.7904E-16                              | 0.000369291      |
| P01024         | C3       | 0.594138865     | 0.588274349                                 | 2.357E-08                                        | 0.000855199 | 7.0592E-16                              | 0.000631681      |
| Q14005         | IL16     | 0.23033519      | 0.237400985                                 | 4.271E-09                                        | 0.000651118 | 2.2301E-17                              | 0.000660836      |
| P12956         | XRCC6    | 0.179825644     | 0.192845513                                 | 9.608E-08                                        | 0.000971817 | 4.8595E-14                              | 0.001758989      |
| P55008         | AIF1     | 0.344025162     | 0.34967201                                  | 5.447E-08                                        | 0.000913508 | 7.8303E-12                              | 6.80272E-05      |
| P52292         | KPNA2    | 0.576832085     | 0.585079807                                 | 5.707E-09                                        | 0.00068999  | 1.2065E-17                              | 0.001166181      |
| Q02750         | MAP2K1   | 0.359077237     | 0.362158859                                 | 4.702E-07                                        | 0.001234208 | 8.6888E-13                              | 8.74636E-05      |
| P11387         | TOP1     | 0.161052587     | 0.172640307                                 | 7.554E-06                                        | 0.001943635 | 2.8135E-13                              | 0.000544218      |
| P63279         | UBE2I    | 0.402202186     | 0.406545614                                 | 1.118E-07                                        | 0.001000972 | 9.1848E-12                              | 0.000913508      |
| P07947         | YES1     | 0.530683894     | 0.535492527                                 | 5.545E-08                                        | 0.000923226 | 1.0937E-15                              | 0.000515063      |
| P16403         | HIST1H1C | 0.18202697      | 0.179435862                                 | 2.033E-12                                        | 0.000301263 | 1.1917E-21                              | 0.000991254      |
| P18031         | PTPN1    | 0.513454609     | 0.518122474                                 | 4.335E-06                                        | 0.001749271 | 2.7091E-11                              | 0.000145773      |
| P20810         | CAST     | 0.625591416     | 0.647812276                                 | 1.392E-10                                        | 0.000456754 | 1.1152E-10                              | 0.000466472      |
| P02144         | MB       | 0.444987418     | 0.457379403                                 | 1.781E-06                                        | 0.001516035 | 1.3409E-12                              | 0.000680272      |
| P60568         | IL2      | 0.602649926     | 0.607874718                                 | 8.102E-07                                        | 0.001341108 | 8.832E-12                               | 7.77454E-05      |
| P25774         | CTSS     | 0.691366271     | 0.70449585                                  | 1.438E-06                                        | 0.001457726 | 2.5524E-06                              | 1.94363E-05      |
| POCG37         | CFC1     | 0.480568112     | 0.480547449                                 | 1.329E-07                                        | 0.001078717 | 6.6844E-15                              | 9.71817E-05      |

| Uniprot ID     | Gene ID     | Fold expression | Predicted Linear Model Ratios (IPF/Healthy) | P-values significant after Bonferroni correction | FDR         | Age-adjusted P-values significant after |                  |
|----------------|-------------|-----------------|---------------------------------------------|--------------------------------------------------|-------------|-----------------------------------------|------------------|
|                |             |                 |                                             |                                                  |             | Bonferroni Correction                   | Age-adjusted FDR |
| O43464         | HTRA2       | 0.727295489     | 0.719331748                                 | 7.34E-07                                         | 0.001321672 | 2.8688E-09                              | 0.000485909      |
| O75594         | PGLYRP1     | 0.385704603     | 0.406150492                                 | 1.661E-06                                        | 0.001506317 | 1.0747E-11                              | 0.000126336      |
| Q13554         | CAMK2B      | 0.448493259     | 0.46201085                                  | 3.863E-06                                        | 0.001720117 | 8.3106E-06                              | 0.000651118      |
| Q06124         | PTPN11      | 0.325170474     | 0.320946853                                 | 7.107E-11                                        | 0.000417881 | 7.5569E-24                              | 0.00133139       |
| Q13557         | CAMK2D      | 0.448876214     | 0.457971263                                 | 1.144E-06                                        | 0.001409135 | 3.2017E-08                              | 0.000923226      |
| P10145         | CXCL8       | 0.034225488     | 0.036256866                                 | 3.956E-08                                        | 0.000894072 | 7.9872E-23                              | 0.000194363      |
| P56199, P05556 | ITGA1 ITGB1 | 0.298316266     | 0.315384647                                 | 5.57E-07                                         | 0.001263362 | 1.0694E-12                              | 5.8309E-05       |
| P24158         | PRTN3       | 0.241989732     | 0.250856356                                 | 2.183E-06                                        | 0.001584062 | 1.1768E-09                              | 0.00058309       |
| Q16832         | DDR2        | 0.59816339      | 0.593148426                                 | 1.398E-06                                        | 0.001448008 | 8.3643E-13                              | 0.001088435      |
| O00602         | FCN1        | 0.487691807     | 0.491252641                                 | 4.684E-06                                        | 0.001788144 | 2.947E-09                               | 0.000388727      |
| P36507         | MAP2K2      | 0.399325508     | 0.409209093                                 | 3.71E-09                                         | 0.000641399 | 1.0395E-20                              | 0.000301263      |
| P46527         | CDKN1B      | 0.390461304     | 0.389275226                                 | 1.256E-09                                        | 0.000592809 | 8.6472E-14                              | 0.001205053      |
| P09603         | CSF1        | 0.349185705     | 0.345595517                                 | 5.652E-06                                        | 0.001846453 | 2.4947E-11                              | 0.001253644      |
| P35354         | PTGS2       | 0.300945517     | 0.304112877                                 | 8.668E-10                                        | 0.000563654 | 3.2731E-23                              | 4.85909E-05      |
| P06241         | FYN         | 0.15968612      | 0.158580485                                 | 9.413E-11                                        | 0.0004276   | 3.0673E-28                              | 0.001039845      |
| P62081         | RPS7        | 0.185649796     | 0.187803316                                 | 6.968E-10                                        | 0.000553936 | 4.3763E-22                              | 0.0005345        |
| P18669         | PGAM1       | 0.380200082     | 0.367406052                                 | 2.737E-10                                        | 0.000485909 | 2.1317E-13                              | 9.71817E-06      |
| P08107         | HSPA1A      | 0.329230499     | 0.325625349                                 | 3.616E-13                                        | 0.000252672 | 5.5044E-21                              | 0.000184645      |
| P01011         | SERPINA3    | 0.457669471     | 0.44651438                                  | 5.712E-07                                        | 0.001273081 | 9.634E-12                               | 0.000670554      |
| P14550         | AKR1A1      | 0.591448395     | 0.596031761                                 | 3.696E-06                                        | 0.001690962 | 1.6211E-07                              | 0.000505345      |
| P23528         | CFL1        | 0.669498441     | 0.658275648                                 | 7.5E-06                                          | 0.001933916 | 1.3489E-09                              | 0.000204082      |
| O60506         | SYNCRIP     | 0.291191938     | 0.297780019                                 | 9.354E-08                                        | 0.000962099 | 4.8968E-20                              | 0.0001069        |
| Q99471         | PFDN5       | 0.254728054     | 0.25020284                                  | 6.318E-09                                        | 0.000699708 | 1.7807E-24                              | 0.000563654      |
| P06744         | GPI         | 0.529843615     | 0.523601892                                 | 1.48E-08                                         | 0.00079689  | 2.6058E-12                              | 0.001933916      |
| P30086         | PEBP1       | 0.628052496     | 0.616272435                                 | 4.374E-06                                        | 0.001758989 | 1.2629E-08                              | 0.000738581      |
| Q14498         | RBM39       | 0.17003682      | 0.17844853                                  | 1.313E-07                                        | 0.001059281 | 1.2501E-14                              | 0.000592809      |
| P29350         | PTPN6       | 0.339639104     | 0.338090817                                 | 9.057E-10                                        | 0.000573372 | 2.0333E-16                              | 0.000408163      |
| P02741         | CRP         | 0.625041071     | 0.602656298                                 | 1.204E-06                                        | 0.001418853 | 5.8331E-08                              | 0.000233236      |
| Q9UIK4         | DAPK2       | 0.400809219     | 0.401459963                                 | 2.019E-08                                        | 0.000826045 | 1.0825E-07                              | 0.000952381      |
| P35247         | SFTPD       | 0.226428987     | 0.220331959                                 | 4.803E-12                                        | 0.000330418 | 1.8116E-25                              | 0.000767736      |

| Uniprot ID | Gene ID   | Fold expression | Predicted Linear Model Ratios (IPF/Healthy) | P-values significant after Bonferroni correction | FDR         | Age-adjusted P-values significant after |                  |
|------------|-----------|-----------------|---------------------------------------------|--------------------------------------------------|-------------|-----------------------------------------|------------------|
|            |           |                 |                                             |                                                  |             | Bonferroni Correction                   | Age-adjusted FDR |
| Q99729     | HNRNPAB   | 0.345921247     | 0.35846041                                  | 1.945E-06                                        | 0.001554908 | 4.6961E-09                              | 0.001953353      |
| P62979     | RPS27A    | 0.470375766     | 0.461535957                                 | 5.172E-07                                        | 0.001243926 | 9.9226E-13                              | 0.0002138        |
| Q7Z4V5     | HDGFRP2   | 0.060924947     | 0.055653979                                 | 6.293E-11                                        | 0.000408163 | 4.0153E-34                              | 0.001243926      |
| P14061     | HSD17B1   | 0.176376578     | 0.186493411                                 | 1.353E-07                                        | 0.001088435 | 4.8554E-20                              | 0.002410107      |
| P08700     | IL3       | 0.62221433      | 0.627986419                                 | 3.837E-06                                        | 0.001710398 | 1.9802E-11                              | 0.000223518      |
| P09211     | GSTP1     | 0.544764141     | 0.534249412                                 | 3.899E-07                                        | 0.001205053 | 3.0047E-13                              | 0.000165209      |
| P17174     | GOT1      | 0.524455222     | 0.517574344                                 | 1.944E-09                                        | 0.000602527 | 5.2867E-19                              | 0.000310982      |
| P07355     | ANXA2     | 0.298075338     | 0.296106201                                 | 3.332E-10                                        | 0.000495627 | 4.6371E-22                              | 0.001788144      |
| P40121     | CAPG      | 0.231802025     | 0.233433389                                 | 1.208E-09                                        | 0.00058309  | 1.4771E-12                              | 0.00244898       |
| O15264     | MAPK13    | 0.299068474     | 0.301080845                                 | 1.696E-08                                        | 0.000806608 | 5.1201E-11                              | 0.001875607      |
| P26038     | MSN       | 0.351191486     | 0.349889679                                 | 2.743E-09                                        | 0.000621963 | 3.0007E-12                              | 0.002478134      |
| P43490     | NAMPT     | 0.240390948     | 0.256498616                                 | 3.815E-08                                        | 0.000884354 | 2.7028E-14                              | 0.001584062      |
| Q99497     | PARK7     | 0.310701688     | 0.322106754                                 | 1.307E-08                                        | 0.000777454 | 1.2199E-18                              | 0.00324587       |
| O75144     | ICOSLG    | 0.219547354     | 0.223111787                                 | 1.566E-07                                        | 0.001107872 | 2.0022E-09                              | 0.00180758       |
| Q99706     | KIR2DL4   | 0.478349129     | 0.479635576                                 | 1.145E-07                                        | 0.001030126 | 7.8372E-11                              | 0.002099125      |
| Q14162     | SCARF1    | 0.516331552     | 0.508016155                                 | 1.754E-08                                        | 0.000816327 | 6.8641E-19                              | 0.003313897      |
| P06702     | S100A9    | 0.591697735     | 0.586341331                                 | 1.214E-06                                        | 0.001428571 | 1.0594E-07                              | 0.001195335      |
| POC0L5     | C4A C4B   | 0.358507662     | 0.369051932                                 | 1.363E-12                                        | 0.000291545 | 3.8228E-20                              | 0.000524781      |
| P09429     | HMGB1     | 0.379602216     | 0.375656719                                 | 2.211E-08                                        | 0.000835763 | 4.4323E-16                              | 0.000495627      |
| P29353     | SHC1      | 0.39845923      | 0.390325715                                 | 6.392E-10                                        | 0.000544218 | 3.9594E-20                              | 0.00170068       |
| P04083     | ANXA1     | 0.491332759     | 0.484731275                                 | 2.239E-08                                        | 0.000845481 | 7.6468E-10                              | 0.000174927      |
| Q08945     | SSRP1     | 0.064935707     | 0.074339255                                 | 1.314E-07                                        | 0.001068999 | 7.0746E-21                              | 0.00234208       |
| Q92851     | CASP10    | 0.733486915     | 0.746854294                                 | 4.988E-06                                        | 0.00180758  | 1.6671E-06                              | 0.001457726      |
| P22626     | HNRNPA2B1 | 0.304653849     | 0.304147983                                 | 1.089E-10                                        | 0.000437318 | 3.7583E-14                              | 0.001321672      |
| Q05397     | PTK2      | 0.361679962     | 0.378753188                                 | 8.674E-09                                        | 0.000738581 | 2.6631E-05                              | 0.000379009      |
| P01033     | TIMP1     | 0.679269263     | 0.66674616                                  | 0.000391                                         | 0.002905734 | 6.6026E-08                              | 0.008357629      |
| P01034     | CST3      | 0.63498025      | 0.648738355                                 | 0.0021138                                        | 0.003488824 | 3.7008E-06                              | 0.00808552       |
| P02788     | LTF       | 0.646580172     | 0.660962703                                 | 0.0002031                                        | 0.002633625 | 3.8306E-06                              | 0.004723032      |
| P05186     | ALPL      | 0.730903722     | 0.736706819                                 | 7.331E-05                                        | 0.002303207 | 1.5228E-06                              | 0.007609329      |
| P55773     | CCL23     | 0.582518753     | 0.619691865                                 | 0.0005164                                        | 0.003061224 | 3.935E-07                               | 0.003226433      |

| Uniprot ID | Gene ID  | Fold expression | Predicted Linear Model Ratios (IPF/Healthy) | P-values significant after |             | Age-adjusted P-values significant after |                  |
|------------|----------|-----------------|---------------------------------------------|----------------------------|-------------|-----------------------------------------|------------------|
|            |          |                 |                                             | Bonferroni correction      | FDR         | Bonferroni Correction                   | Age-adjusted FDR |
| P07451     | CA3      | 0.595832363     | 0.560995319                                 | 0.0029284                  | 0.003654033 | 2.8427E-06                              | 0.001350826      |
| P63241     | EIF5A    | 0.639598496     | 0.626260436                                 | 4.906E-05                  | 0.002264334 | 1.829E-08                               | 0.004752187      |
| P61088     | UBE2N    | 0.679152378     | 0.668632317                                 | 9.424E-05                  | 0.002380952 | 3.7967E-06                              | 0.002779397      |
| POC055     | H2AFZ    | 0.085008123     | 0.094716988                                 | 1.043E-05                  | 0.002001944 | 2.6092E-14                              | 0.004344023      |
| Q9NP79     | VTA1     | 0.68463685      | 0.665210265                                 | 1.045E-05                  | 0.002011662 | 5.6174E-11                              | 0.005344995      |
| P25787     | PSMA2    | 0.390509178     | 0.357843285                                 | 0.0047528                  | 0.003906706 | 1.1165E-07                              | 0.005004859      |
| P05155     | SERPING1 | 0.407843012     | 0.377329305                                 | 0.002597                   | 0.003586006 | 1.7868E-08                              | 0.001078717      |
| P04141     | CSF2     | 0.716695601     | 0.70886671                                  | 0.0024597                  | 0.003566569 | 1.5111E-06                              | 0.005218659      |
| P08833     | IGFBP1   | 0.393702902     | 0.408439401                                 | 0.000134                   | 0.002478134 | 1.192E-06                               | 0.009339164      |
| P80188     | LCN2     | 0.192644603     | 0.212966828                                 | 0.0001084                  | 0.002419825 | 2.3708E-10                              | 0.004003887      |
| P62979     | RPS27A   | 0.748787706     | 0.725982264                                 | 0.0001239                  | 0.002458698 | 1.3893E-10                              | 0.0002138        |
| Q16627     | CCL14    | 0.730237589     | 0.725946814                                 | 0.0004162                  | 0.002944606 | 7.5672E-06                              | 0.006297376      |
| O14625     | CXCL11   | 0.480301473     | 0.471102974                                 | 0.0003025                  | 0.00281827  | 1.7786E-07                              | 0.004266278      |
| Q9HD89     | RETN     | 0.53666193      | 0.538277838                                 | 0.0002682                  | 0.002750243 | 1.1095E-07                              | 0.007832847      |
| P18428     | LBP      | 0.601598528     | 0.621936449                                 | 0.0001787                  | 0.00260447  | 4.7373E-08                              | 0.010447036      |
| P20333     | TNFRSF1B | 0.528556645     | 0.530989059                                 | 0.0001396                  | 0.00249757  | 2.0522E-09                              | 0.004596696      |
| P23946     | CMA1     | 0.422400525     | 0.449911378                                 | 0.000103                   | 0.002410107 | 6.0735E-08                              | 0.008551992      |
| P78380     | OLR1     | 0.376747719     | 0.387146365                                 | 1.569E-05                  | 0.002060253 | 4.2928E-09                              | 0.001729835      |
| P61960     | UFM1     | 0.61686735      | 0.606344498                                 | 1.583E-05                  | 0.002069971 | 1.0983E-09                              | 0.00281827       |
| P78344     | EIF4G2   | 0.517757776     | 0.509215443                                 | 5.586E-05                  | 0.002274052 | 1.092E-08                               | 0.004013605      |
| Q8IVD9     | NUDCD3   | 0.555472185     | 0.548221386                                 | 1.009E-05                  | 0.001992225 | 1.1417E-10                              | 0.003119534      |
| P60174     | TPI1     | 0.693640403     | 0.683253702                                 | 8.747E-05                  | 0.002361516 | 3.7814E-06                              | 0.006287658      |
| PODJ18     | SAA1     | 0.173531112     | 0.180295633                                 | 0.0004928                  | 0.00303207  | 3.3565E-08                              | 0.00090379       |
| Q07654     | TFF3     | 0.478602321     | 0.492382656                                 | 0.0051497                  | 0.003974733 | 8.1428E-06                              | 0.005228377      |
| P13726     | F3       | 0.592836215     | 0.609717233                                 | 0.0001829                  | 0.002614189 | 2.7012E-07                              | 0.002827988      |
| P19957     | PI3      | 0.359454756     | 0.367402763                                 | 8.107E-05                  | 0.002332362 | 1.1063E-10                              | 0.00526725       |
| P14555     | PLA2G2A  | 0.164508441     | 0.178116603                                 | 0.0004127                  | 0.002934888 | 2.7444E-09                              | 0.002322643      |
| P29317     | EPHA2    | 0.543657766     | 0.539472754                                 | 0.0029097                  | 0.003644315 | 2.3118E-06                              | 0.007152575      |
| Q08ET2     | SIGLEC14 | 0.653055432     | 0.645056946                                 | 0.0003386                  | 0.002857143 | 8.2826E-06                              | 0.004897959      |
| Q8TDQ0     | HAVCR2   | 0.738663283     | 0.733196887                                 | 0.0002157                  | 0.002691934 | 8.6442E-06                              | 0.008678328      |



| Uniprot ID     | Gene ID  | Fold expression | Predicted Linear Model Ratios (IPF/Healthy) | P-values significant after Bonferroni correction | FDR         | Age-adjusted P-values significant after |                  |
|----------------|----------|-----------------|---------------------------------------------|--------------------------------------------------|-------------|-----------------------------------------|------------------|
|                |          |                 |                                             |                                                  |             | Bonferroni Correction                   | Age-adjusted FDR |
| P13686         | ACPS     | 1.504767826     | 1.489334666                                 | 4.532E-09                                        | 0.000670554 | 9.3819E-07                              | 0.000777454      |
| P20273         | CD22     | 1.184673275     | 1.176234949                                 | 8.388E-09                                        | 0.000728863 | 3.2038E-06                              | 0.003605442      |
| P51665         | PSMD7    | 1.227734879     | 1.221843412                                 | 6.226E-10                                        | 0.0005345   | 7.0956E-06                              | 0.002050534      |
| Q07817         | BCL2L1   | 1.490277914     | 1.479585533                                 | 2.427E-12                                        | 0.000310982 | 5.7369E-08                              | 0.000884354      |
| P06396         | GSN      | 1.285528406     | 1.306069247                                 | 3.753E-06                                        | 0.00170068  | 7.1603E-07                              | 0.001418853      |
| P04196         | HRG      | 1.418870563     | 1.442868446                                 | 2.642E-07                                        | 0.001166181 | 1.6043E-07                              | 0.001360544      |
| Q9HCK4         | ROBO2    | 1.407713095     | 1.395479599                                 | 1.126E-07                                        | 0.00101069  | 1.6629E-08                              | 0.001516035      |
| P12268         | IMPDH2   | 1.338326362     | 1.339255747                                 | 2.562E-10                                        | 0.00047619  | 5.2757E-06                              | 0.00313897       |
| P22223         | CDH3     | 1.385373136     | 1.399310188                                 | 1.063E-07                                        | 0.000981535 | 2.2775E-07                              | 0.003634597      |
| P07225         | PROS1    | 1.272634163     | 1.275797707                                 | 2.912E-07                                        | 0.001185617 | 4.6845E-09                              | 0.002176871      |
| O43291         | SPINT2   | 1.485466338     | 1.458185513                                 | 1.299E-06                                        | 0.00143829  | 1.8954E-06                              | 0.001982507      |
| Q9BY41         | HDAC8    | 1.424686176     | 1.425858407                                 | 2.406E-16                                        | 0.000155491 | 1.5161E-09                              | 0.006598639      |
| P08697         | SERPINF2 | 1.31047173      | 1.30667218                                  | 1.367E-08                                        | 0.000787172 | 3.6237E-11                              | 0.002934888      |
| P02748         | C9       | 0.781050273     | 0.782880587                                 | 1.145E-07                                        | 0.001020408 | 1.3663E-07                              | 0.002332362      |
| P29622         | SERPINA4 | 1.269072953     | 1.257079381                                 | 8.1E-06                                          | 0.001953353 | 3.5722E-06                              | 0.001496599      |
| Q96IY4         | CPB2     | 0.819875158     | 0.824769315                                 | 4.543E-06                                        | 0.001778426 | 4.0513E-07                              | 0.003449951      |
| P31785         | IL2RG    | 1.545659909     | 1.496723647                                 | 6.757E-07                                        | 0.001311953 | 0.00018474                              | 0.0004276        |
| P26951         | IL3RA    | 1.508301381     | 1.468159905                                 | 2.326E-06                                        | 0.00159378  | 0.00142495                              | 0.00143829       |
| O76036         | NCR1     | 0.741569652     | 0.755075196                                 | 5.621E-06                                        | 0.001836735 | 2.8209E-05                              | 0.00212828       |
| P02649         | APOE     | 1.325399966     | 1.282131162                                 | 2.048E-07                                        | 0.001137026 | 0.000283                                | 0.001622935      |
| P10721         | KIT      | 1.489125587     | 1.416727689                                 | 7.463E-09                                        | 0.000719145 | 9.22E-06                                | 0.001652089      |
| P09758         | TACSTD2  | 1.420541839     | 1.416748142                                 | 7.103E-08                                        | 0.000952381 | 0.00034927                              | 0.001506317      |
| P00533         | EGFR     | 1.30263973      | 1.283543266                                 | 6.012E-06                                        | 0.001895044 | 1.9617E-05                              | 0.001399417      |
| Q9BYF1         | ACE2     | 1.343109036     | 1.351129252                                 | 7.681E-07                                        | 0.00133139  | 0.00036686                              | 0.006180758      |
| P02649         | APOE     | 1.244447984     | 1.206073828                                 | 7.474E-06                                        | 0.001924198 | 0.0024964                               | 0.001622935      |
| P02649         | APOE     | 1.286022867     | 1.239419842                                 | 2.083E-06                                        | 0.001574344 | 0.00025421                              | 0.001622935      |
| P17931         | LGALS3   | 0.752839331     | 0.772008464                                 | 2.628E-07                                        | 0.001156463 | 1.0971E-05                              | 0.000398445      |
| P35475         | IDUA     | 1.411818675     | 1.445766652                                 | 5.303E-07                                        | 0.001253644 | 7.8693E-05                              | 0.000748299      |
| P01374, Q06643 | LTA LTB  | 1.393305269     | 1.389026313                                 | 1.467E-06                                        | 0.001477162 | 9.2873E-05                              | 0.004664723      |
| P29965         | CD40LG   | 1.474153245     | 1.453863625                                 | 1.945E-06                                        | 0.00154519  | 0.00291881                              | 0.003790087      |

| Uniprot ID     | Gene ID    | Fold expression | Predicted Linear Model Ratios (IPF/Healthy) | P-values significant after Bonferroni correction | FDR         | Age-adjusted P-values significant after |                  |
|----------------|------------|-----------------|---------------------------------------------|--------------------------------------------------|-------------|-----------------------------------------|------------------|
|                |            |                 |                                             |                                                  |             | Bonferroni Correction                   | Age-adjusted FDR |
| Q9Y4X3         | CCL27      | 1.173722536     | 1.162169851                                 | 3.663E-06                                        | 0.001681244 | 6.6273E-05                              | 0.00122449       |
| P07585         | DCN        | 1.20880279      | 1.189205245                                 | 5.211E-06                                        | 0.001817298 | 0.00010196                              | 0.001885326      |
| Q9NP95         | FGF20      | 1.438391531     | 1.407985353                                 | 5.916E-06                                        | 0.001875607 | 0.00576751                              | 0.002390671      |
| P08684         | CYP3A4     | 1.445797436     | 1.410315476                                 | 3.527E-06                                        | 0.001661808 | 5.9022E-05                              | 0.00111759       |
| P29279         | CTGF       | 1.32159639      | 1.299436776                                 | 5.526E-06                                        | 0.001827017 | 0.00012742                              | 0.002585034      |
| P56470         | LGALS4     | 1.363080837     | 1.386548727                                 | 2.305E-07                                        | 0.001146744 | 0.0004329                               | 0.001642371      |
| Q15582         | TGFB1      | 1.377537653     | 1.384270242                                 | 1.785E-06                                        | 0.001525753 | 0.00011283                              | 0.001273081      |
| Q8IWW2         | CNTN4      | 1.266326604     | 1.257256862                                 | 4.96E-06                                         | 0.001797862 | 1.4765E-05                              | 0.001107872      |
| O94779         | CNTN5      | 1.258655438     | 1.254045937                                 | 1.594E-06                                        | 0.001496599 | 8.4023E-05                              | 0.002837707      |
| P06493, P14635 | CDC2 CCNB1 | 1.198173718     | 1.181337678                                 | 3.301E-06                                        | 0.001613217 | 0.00089827                              | 0.005578231      |
| Q92876         | KLK6       | 0.864513016     | 0.866147653                                 | 2.492E-06                                        | 0.001603499 | 0.00035015                              | 0.006375121      |
| O00626         | CCL22      | 1.424081215     | 1.429480123                                 | 3.309E-06                                        | 0.001622935 | 0.00020088                              | 0.004635569      |
| P01282         | VIP        | 1.424445332     | 1.413234053                                 | 5.966E-06                                        | 0.001885326 | 0.00344855                              | 0.002089407      |
| Q6UXD5         | SEZ6L2     | 1.407069992     | 1.369992374                                 | 8.816E-06                                        | 0.001972789 | 0.0005441                               | 0.009193392      |
| P68036         | UBE2L3     | 1.467831972     | 1.427595832                                 | 3.606E-06                                        | 0.001671526 | 0.00063943                              | 0.009115646      |
| Q96GD0         | PDXP       | 1.490673622     | 1.447598284                                 | 7.077E-06                                        | 0.00191448  | 0.00047606                              | 0.000835763      |
| P08620         | FGF4       | 1.23892107      | 1.229893786                                 | 6.193E-07                                        | 0.001302235 | 0.00118849                              | 0.001661808      |
| Q99075         | HBEGF      | 1.293217012     | 1.291360122                                 | 4.647E-07                                        | 0.00122449  | 0.00106179                              | 0.000758017      |
| P20783         | NTF3       | 1.414871631     | 1.405958216                                 | 5.997E-07                                        | 0.001292517 | 0.00121293                              | 0.000456754      |
| P32004         | L1CAM      | 1.422955729     | 1.402037028                                 | 4.477E-07                                        | 0.001214772 | 1.0997E-05                              | 0.002361516      |
| O43323         | DHH        | 1.427120242     | 1.403360929                                 | 1.827E-06                                        | 0.001535471 | 0.00075255                              | 0.000864917      |
| O43320         | FGF16      | 1.401626175     | 1.370275971                                 | 1.549E-06                                        | 0.00148688  | 0.00060477                              | 0.002419825      |
| O75356         | ENTPD5     | 1.27036547      | 1.282597991                                 | 3.47E-06                                         | 0.001652089 | 1.6184E-05                              | 0.001020408      |
| Q4KMG0         | CDON       | 1.438856529     | 1.395132851                                 | 6.493E-06                                        | 0.001904762 | 1.3063E-05                              | 0.000573372      |
| P10909         | CLU        | 1.268085243     | 1.273973382                                 | 4.497E-06                                        | 0.001768707 | 9.0924E-05                              | 0.000826045      |
| Q9NZU1         | FLRT1      | 1.438468618     | 1.404044634                                 | 9.319E-07                                        | 0.001360544 | 0.00032809                              | 0.002069971      |
| P21217         | FUT3       | 1.457634251     | 1.441771268                                 | 2.029E-07                                        | 0.001127308 | 0.00057164                              | 0.000874636      |
| Q12884         | FAP        | 1.355855033     | 1.36028669                                  | 3.434E-06                                        | 0.001642371 | 0.00025698                              | 0.000136054      |
| Q02241         | KIF23      | 1.439636723     | 1.387282427                                 | 3.31E-06                                         | 0.001632653 | 0.00061253                              | 0.000417881      |
| P45984         | MAPK9      | 1.366287937     | 1.385188001                                 | 5.896E-06                                        | 0.001865889 | 0.00016857                              | 0.001302235      |

| Uniprot ID | Gene ID | Fold expression | Predicted Linear Model Ratios (IPF/Healthy) | P-values significant after Bonferroni correction | FDR         | Age-adjusted P-values significant after Bonferroni Correction |                  |
|------------|---------|-----------------|---------------------------------------------|--------------------------------------------------|-------------|---------------------------------------------------------------|------------------|
|            |         |                 |                                             |                                                  |             | Age-adjusted P-values significant after Bonferroni Correction | Age-adjusted FDR |
| P48061     | CXCL12  | 0.779402388     | 0.782938513                                 | 9.425E-06                                        | 0.001982507 | 6.6164E-06                                                    | 0.00447036       |
| P29401     | TKT     | 0.76346032      | 0.750233644                                 | 0.0004592                                        | 0.003002915 | 7.2265E-06                                                    | 0.009737609      |

-  Upregulated in IPF AND Age-adjusted AND non-age-adjusted significant
-  Upregulated in IPF AND non-age significant
-  Age-adjusted AND/OR non-age-adjusted significant but not biologically relevant
-  Downregulated in IPF AND Age-adjusted AND non-age-adjusted significant
-  Downregulated in IPF AND Age-adjusted significant
-  Downregulated in IPF AND non-age-adjusted significant

**Table S6 ClueGO analysis of biological roles of upregulated proteins in IPF plasma**

| GOTerm                                               | Ontology Source                             | Term PValue | Term PValue Corrected with Bonferroni | Group PValue Corrected with Bonferroni | % Associated Genes | Nr. Genes | Associated Genes Found                                                                   |
|------------------------------------------------------|---------------------------------------------|-------------|---------------------------------------|----------------------------------------|--------------------|-----------|------------------------------------------------------------------------------------------|
| regulation of cardiac muscle hypertrophy             | GO_BiologicalProcess-GOA_09.02.2016_16h18   | 71.0E-9     | 2.9E-6                                | 210.0E-9                               | 12.82              | 5.00      | [ECE1, GSK3A, GSK3B, PDE5A, PRKCA]<br>[GSK3B, MAP2K4, PIK3CA, PIK3R1, PRKCA, PRKCB, SRC] |
| ErbB signaling pathway                               | KEGG_10.02.2016                             | 4.0E-9      | 160.0E-9                              | 17.0E-15                               | 8.05               | 7.00      | [PIK3CA, PIK3R1, PRKCA, PRKCB, RAC1, SPHK1]                                              |
| Sphingolipid signaling pathway                       | KEGG_10.02.2016                             | 950.0E-9    | 39.0E-6                               | 17.0E-15                               | 5.00               | 6.00      | [MAPKAPK2, PIK3CA, PIK3R1, PRKCA, PRKCB, RAC1, SPHK1, SRC]                               |
| VEGF signaling pathway                               | KEGG_10.02.2016                             | 5.1E-12     | 210.0E-12                             | 17.0E-15                               | 13.11              | 8.00      | [BTK, GSK3B, PIK3CA, PIK3R1, PRKCB, RAC1]                                                |
| B cell receptor signaling pathway                    | KEGG_10.02.2016                             | 49.0E-9     | 2.0E-6                                | 17.0E-15                               | 8.22               | 6.00      | [BTK, MAP2K4, PIK3CA, PIK3R1, PRKCA, RAC1]                                               |
| Fc epsilon RI signaling pathway                      | KEGG_10.02.2016                             | 32.0E-9     | 1.3E-6                                | 17.0E-15                               | 8.82               | 6.00      | [PIK3CA, PIK3R1, PRKCA, PRKCB, RAC1, SPHK1]                                              |
| Fc gamma R-mediated phagocytosis                     | KEGG_10.02.2016                             | 210.0E-9    | 8.6E-6                                | 17.0E-15                               | 6.45               | 6.00      | [GSK3B, PIK3CA, PIK3R1, PRKCA, PRKCB, SRC]                                               |
| Thyroid hormone signaling pathway                    | KEGG_10.02.2016                             | 860.0E-9    | 35.0E-6                               | 17.0E-15                               | 5.08               | 6.00      | [FN1, PIK3CA, PIK3R1, PRKCA, PRKCB, RAC1]                                                |
| AGE-RAGE signaling pathway in diabetic complications | KEGG_10.02.2016                             | 340.0E-9    | 14.0E-6                               | 17.0E-15                               | 5.94               | 6.00      | [FN1, PIK3CA, PIK3R1, RAC1, SRC]                                                         |
| Bacterial invasion of epithelial cells               | KEGG_10.02.2016                             | 2.4E-6      | 99.0E-6                               | 17.0E-15                               | 6.41               | 5.00      | [CSK, PIK3CA, PIK3R1, RAC1, SRC, TNFSF13B]                                               |
| T cell costimulation                                 | GO_ImmuneSystemProcess-GOA_09.02.2016_16h18 | 210.0E-9    | 8.6E-6                                | 17.0E-15                               | 6.45               | 6.00      | [APOA1, CLIC1, CSK, F5, FN1, PIK3CA, PIK3R1, PRKCA, PRKCB, RAC1, SELP, SRC, TEC]         |
| platelet activation                                  | GO_BiologicalProcess-GOA_09.02.2016_16h18   | 430.0E-15   | 17.0E-12                              | 17.0E-15                               | 4.69               | 13.00     | [GSK3A, PIK3R1, PRKCA, PRKCB, SRC]                                                       |
| regulation of cellular response to insulin stimulus  | GO_BiologicalProcess-GOA_09.02.2016_16h18   | 700.0E-9    | 28.0E-6                               | 17.0E-15                               | 8.20               | 5.00      | [C1R, C4B, C5, F5, SERPINA5]                                                             |
| Complement and coagulation cascades                  | GOA_09.02.2016_16h18                        | -9          | 28.0E-6                               | 17.0E-15                               | 8.20               | 5.00      | [GSK3A, PIK3R1, PRKCA, PRKCB, SRC]                                                       |

**Table S7 ClueGo analysis of the biological roles of downregulated proteins in IPF plasma**

| GOTerm                                                 | Ontology Source                             | Term PValue | Term PValue Corrected with Bonferroni | Group PValue Corrected with Bonferroni | % Associated Genes | Nr. Genes | Associated Genes Found                                                                                                                                                             |
|--------------------------------------------------------|---------------------------------------------|-------------|---------------------------------------|----------------------------------------|--------------------|-----------|------------------------------------------------------------------------------------------------------------------------------------------------------------------------------------|
| acute inflammatory response                            | GO_BiologicalProcess-GOA_09.02.2016_16h18   | 67.0E-9     | 11.0E-6                               | 740.0E-9                               | 6.10               | 10.00     | [C3, CRP, F3, GSTP1, LBP, PTGS2, SAA1, SERPINA3, SERPING1, TIMP1]                                                                                                                  |
| Fc receptor signaling pathway                          | GO_ImmuneSystemProcess-GOA_09.02.2016_16h18 | 650.0E-12   | 110.0E-9                              | 3.4E-15                                | 4.09               | 17.00     | [CAMK2B, CAMK2D, CDKN1B, CFL1, CSF2, FYN, IL2, IL3, MAP2K1, MAP2K2, PEBP1, PSMA2, PTPN11, RPS27A, SHC1, UBE2N, YES1]                                                               |
| response to peptide hormone                            | GO_BiologicalProcess-GOA_09.02.2016_16h18   | 10.0E-15    | 1.8E-12                               | 3.4E-15                                | 4.07               | 26.00     | [ANXA1, CAMK2B, CAMK2D, CDKN1B, CSF2, FYN, GOT1, GSTP1, IGFBP1, IGFBP2, IL2, IL3, MAP2K1, MAP2K2, NAMPT, PEBP1, POR, PSMA2, PTPN1, PTPN11, PTPN6, RETN, RPS27A, SHC1, TFF3, TIMP1] |
| cellular response to fibroblast growth factor stimulus | GO_BiologicalProcess-GOA_09.02.2016_16h18   | 4.1E-9      | 720.0E-9                              | 3.4E-15                                | 4.26               | 15.00     | [CAMK2B, CAMK2D, CDKN1B, CSF2, CXCL8, FYN, IL2, IL3, MAP2K1, MAP2K2, PEBP1, PSMA2, PTPN11, RPS27A, SHC1]                                                                           |
| response to insulin                                    | GO_BiologicalProcess-GOA_09.02.2016_16h18   | 11.0E-12    | 1.9E-9                                | 3.4E-15                                | 4.18               | 20.00     | [CAMK2B, CAMK2D, CSF2, FYN, GOT1, GSTP1, IGFBP1, IGFBP2, IL2, IL3, MAP2K1, MAP2K2, NAMPT, PEBP1, PSMA2, PTPN1, PTPN11, RETN, RPS27A, SHC1]                                         |
| Fc-epsilon receptor signaling pathway                  | GO_ImmuneSystemProcess-GOA_09.02.2016_16h18 | 3.8E-9      | 660.0E-9                              | 3.4E-15                                | 4.29               | 15.00     | [CAMK2B, CAMK2D, CDKN1B, CSF2, FYN, IL2, IL3, MAP2K1, MAP2K2, PEBP1, PSMA2, PTPN11, RPS27A, SHC1, UBE2N]                                                                           |
| cellular response to insulin stimulus                  | GO_BiologicalProcess-GOA_09.02.2016_16h18   | 97.0E-12    | 17.0E-9                               | 3.4E-15                                | 4.27               | 18.00     | [CAMK2B, CAMK2D, CSF2, FYN, GOT1, GSTP1, IGFBP1, IL2, IL3, MAP2K1, MAP2K2, NAMPT, PEBP1, PSMA2, PTPN1, PTPN11, RPS27A, SHC1]                                                       |
| insulin receptor signaling pathway                     | GO_BiologicalProcess-GOA_09.02.2016_16h18   | 380.0E-12   | 66.0E-9                               | 3.4E-15                                | 4.61               | 16.00     | [CAMK2B, CAMK2D, CDKN1B, CSF2, FYN, IL2, IL3, ITGA1, MAP2K1, MAP2K2, MMP9, PEBP1, PLAUR, PSMA2, PTPN11, RPS27A, SHC1]                                                              |
| epidermal growth factor receptor signaling pathway     | GO_BiologicalProcess-GOA_09.02.2016_16h18   | 150.0E-12   | 27.0E-9                               | 3.4E-15                                | 4.49               | 17.00     | [AIF1, ANXA1, C3, CFL1, CRP, FCN1, FYN, HMGB1, LBP, PRTN3, SFTPD, YES1]                                                                                                            |
| phagocytosis                                           | GO_ImmuneSystemProcess-GOA_09.02.2016_16h18 | 160.0E-9    | 28.0E-6                               | 1.8E-6                                 | 4.26               | 12.00     | [C3, C4B_2, CAST, CDKN1B, CST3, PEBP1, PI3, SERPINA3, SERPING1, TIMP1, TNFSF14]                                                                                                    |
| peptidase regulator activity                           | GO_MolecularFunction-GOA_09.02.2016_16h18   | 150.0E-9    | 26.0E-6                               | 14.0E-12                               | 4.85               | 11.00     | [C3, C4B_2, CAST, CST3, PEBP1, PI3, SERPINA3, SERPING1, TIMP1, TNFSF14]                                                                                                            |
| endopeptidase inhibitor activity                       | GO_MolecularFunction-GOA_09.02.2016_16h18   | 160.0E-9    | 28.0E-6                               | 14.0E-12                               | 5.56               | 10.00     | [C3, C4B_2, CAST, CDKN1B, CST3, F3, GPI, HMGB1, HTRA2, MMP9, PARK7, PEBP1, PI3, PLAUR, POR, S100A9, SERPINA3, SERPING1,                                                            |
| regulation of endopeptidase activity                   | GO_BiologicalProcess-GOA_09.02.2016_16h18   | 490.0E-15   | 86.0E-12                              | 14.0E-12                               | 4.96               | 20.00     |                                                                                                                                                                                    |

TIMP1, TNFSF14]

| GO Term                                                                                                                           | Ontology Source                             | Term P Value | Term P Value Corrected with Bonferroni | Group P Value Corrected with Bonferroni | % Associated Genes | Nr. Genes | Associated Genes Found                                                                                        |
|-----------------------------------------------------------------------------------------------------------------------------------|---------------------------------------------|--------------|----------------------------------------|-----------------------------------------|--------------------|-----------|---------------------------------------------------------------------------------------------------------------|
| negative regulation of endopeptidase activity<br>regulation of cysteine-type endopeptidase activity involved in apoptotic process | GO_BiologicalProcess-GOA_09.02.2016_16h18   | 69.0E-12     | 12.0E-9                                | 14.0E-12                                | 5.73               | 15.00     | [C3, C4B_2, CAST, CST3, GPI, MMP9, PARK7, PEBP1, PI3, PLAUR, POR, SERPINA3, SERPING1, TIMP1, TNFSF14]         |
| positive regulation of leukocyte activation                                                                                       | GO_BiologicalProcess-GOA_09.02.2016_16h18   | 110.0E-9     | 20.0E-6                                | 14.0E-12                                | 4.98               | 11.00     | [CDKN1B, F3, GPI, HMGB1, HTRA2, MMP9, PARK7, PLAUR, POR, S100A9, TNFSF14]                                     |
| leukocyte proliferation                                                                                                           | GO_ImmuneSystemProcess-GOA_09.02.2016_16h18 | 21.0E-9      | 3.8E-6                                 | 25.0E-9                                 | 4.12               | 14.00     | [AIF1, ANXA1, FYN, HAVCR2, HMGB1, IGFBP2, IL2, LBP, PTPN11, PTPN6, S100A9, TIMP1, TNFSF14, YES1]              |
| mononuclear cell proliferation                                                                                                    | GO_BiologicalProcess-GOA_09.02.2016_16h18   | 4.0E-9       | 710.0E-9                               | 25.0E-9                                 | 4.70               | 14.00     | [AIF1, ANXA1, CSF1, FYN, GSTP1, HMGB1, IGFBP2, IL2, IL3, PTPN6, S100A9, SFTPD, TIMP1, TNFSF14]                |
| T cell proliferation                                                                                                              | GO_ImmuneSystemProcess-GOA_09.02.2016_16h18 | 180.0E-9     | 32.0E-6                                | 25.0E-9                                 | 4.21               | 12.00     | [AIF1, ANXA1, FYN, HMGB1, IGFBP2, IL2, PTPN6, S100A9, SFTPD, TIMP1, TNFSF14]                                  |
| regulation of T cell activation                                                                                                   | GO_ImmuneSystemProcess-GOA_09.02.2016_16h18 | 280.0E-9     | 49.0E-6                                | 25.0E-9                                 | 5.24               | 10.00     | [AIF1, ANXA1, FYN, HAVCR2, HMGB1, IGFBP2, IL2, PTPN11, PTPN6, SFTPD, TIMP1, TNFSF14, YES1]                    |
| positive regulation of T cell activation                                                                                          | GO_ImmuneSystemProcess-GOA_09.02.2016_16h18 | 83.0E-9      | 14.0E-6                                | 25.0E-9                                 | 4.06               | 13.00     | [AIF1, ANXA1, FYN, HMGB1, IGFBP2, IL2, PTPN11, PTPN6, TIMP1, TNFSF14, YES1]                                   |
| regulation of leukocyte proliferation                                                                                             | GO_BiologicalProcess-GOA_09.02.2016_16h18   | 150.0E-9     | 26.0E-6                                | 25.0E-9                                 | 4.85               | 11.00     | [AIF1, ANXA1, CSF1, GSTP1, HMGB1, IGFBP2, IL2, IL3, PTPN6, S100A9, SFTPD, TIMP1]                              |
| positive regulation of leukocyte proliferation                                                                                    | GO_BiologicalProcess-GOA_09.02.2016_16h18   | 11.0E-9      | 1.9E-6                                 | 25.0E-9                                 | 5.43               | 12.00     | [AIF1, ANXA1, CSF1, HMGB1, IGFBP2, IL2, IL3, S100A9, TIMP1]                                                   |
| cellular response to interferon-gamma                                                                                             | GO_ImmuneSystemProcess-GOA_09.02.2016_16h18 | 250.0E-9     | 44.0E-6                                | 25.0E-9                                 | 6.25               | 9.00      | [AIF1, ANXA1, CSF1, HMGB1, IGFBP2, IL2, IL3, S100A9, TIMP1]                                                   |
| ERK1 and ERK2 cascade                                                                                                             | GO_ImmuneSystemProcess-GOA_09.02.2016_16h18 | 280.0E-9     | 50.0E-6                                | 150.0E-12                               | 6.16               | 9.00      | [AIF1, CAMK2B, CAMK2D, CCL14, CCL23, PTPN1, PTPN11, PTPN6, SYNCRIP]                                           |
| regulation of ERK1 and ERK2 cascade                                                                                               | GO_BiologicalProcess-GOA_09.02.2016_16h18   | 91.0E-12     | 15.0E-9                                | 150.0E-12                               | 5.62               | 15.00     | [C3, CAMK2D, CCL14, CCL23, EPHA2, GSTP1, HMGB1, MAP2K1, MAP2K2, PLA2G2A, PTPN1, PTPN11, PTPN6, S100A9, TIMP1] |
| granulocyte chemotaxis                                                                                                            | GO_BiologicalProcess-GOA_09.02.2016_16h18   | 4.3E-9       | 750.0E-9                               | 150.0E-12                               | 5.22               | 13.00     | [C3, CAMK2D, CCL14, CCL23, EPHA2, GSTP1, HMGB1, PLA2G2A, PTPN1, PTPN11, PTPN6, S100A9, TIMP1]                 |
| neutrophil chemotaxis                                                                                                             | GO_ImmuneSystemProcess-GOA_09.02.2016_16h18 | 2.0E-9       | 350.0E-9                               | 22.0E-9                                 | 8.77               | 10.00     | [ANXA1, CCL14, CCL23, CSF1, CXCL8, DAPK2, ITGA1, LBP, S100A9, SAA1]                                           |
| positive regulation of leukocyte chemotaxis                                                                                       | GO_ImmuneSystemProcess-GOA_09.02.2016_16h18 | 120.0E-9     | 21.0E-6                                | 22.0E-9                                 | 8.42               | 8.00      | [CCL14, CCL23, CXCL8, DAPK2, ITGA1, LBP, S100A9, SAA1]                                                        |
|                                                                                                                                   | GO_ImmuneSystemProcess-GOA_09.02.2016_16h18 | 55.0E-9      | 9.7E-6                                 | 74.0E-24                                | 9.30               | 8.00      | [AIF1, CSF1, CXCL11, CXCL8, DAPK2, HMGB1, LBP, TNFSF14]                                                       |

| GO Term                                                          | Ontology Source                           | Term P Value | Term P Value Corrected with Bonferroni | Group P Value Corrected with Bonferroni | % Associated Genes | Nr. Genes | Associated Genes Found                                                                                                                                                                                            |
|------------------------------------------------------------------|-------------------------------------------|--------------|----------------------------------------|-----------------------------------------|--------------------|-----------|-------------------------------------------------------------------------------------------------------------------------------------------------------------------------------------------------------------------|
| inflammatory response                                            | GO_BiologicalProcess-GOA_09.02.2016_16h18 | 26.0E-18     | 4.6E-15                                | 74.0E-24                                | 4.20               | 30.00     | [AIF1, ANXA1, C3, C4B_2, CCL14, CCL23, CMA1, CRP, CSF1, CTSS, CXCL11, CXCL8, F3, GSTP1, HAVCR2, HMGB1, IL2, LBP, MAPK13, OLR1, PARK7, PGLYRP1, PLA2G2A, PTGS2, S100A9, SAA1, SERPINA3, SERPING1, TIMP1, TNFRSF1B] |
| positive regulation of response to external stimulus             | GO_BiologicalProcess-GOA_09.02.2016_16h18 | 20.0E-18     | 3.6E-15                                | 74.0E-24                                | 7.03               | 22.00     | [AIF1, C3, CCL14, CCL23, CSF1, CTSS, CXCL11, CXCL8, DAPK2, F3, HAVCR2, HMGB1, IL16, IL2, LBP, MAPK13, PARK7, PLA2G2A, PTGS2, S100A9, SCARF1, TNFSF14]                                                             |
| positive regulation of defense response                          | GO_BiologicalProcess-GOA_09.02.2016_16h18 | 4.9E-12      | 860.0E-12                              | 74.0E-24                                | 4.38               | 20.00     | [C3, CCL14, CCL23, CTSS, FCN1, FYN, HAVCR2, HMGB1, IL2, LBP, LTF, MAP2K1, MAPK13, PGLYRP1, PLA2G2A, PSMA2, PTGS2, RPS27A, S100A9, UBE2N]                                                                          |
| positive regulation of chemotaxis                                | GO_BiologicalProcess-GOA_09.02.2016_16h18 | 9.7E-9       | 1.7E-6                                 | 74.0E-24                                | 7.46               | 10.00     | [AIF1, CSF1, CXCL11, CXCL8, DAPK2, F3, HMGB1, IL16, LBP, TNFSF14]                                                                                                                                                 |
| regulation of response to wounding                               | GO_BiologicalProcess-GOA_09.02.2016_16h18 | 23.0E-18     | 4.1E-15                                | 74.0E-24                                | 5.59               | 25.00     | [ANXA1, ANXA2, C3, CCL14, CCL23, CMA1, CTSS, F3, GSTP1, HMGB1, IL2, LBP, MAP2K1, MAP2K2, MAPK13, PARK7, PGLYRP1, PLA2G2A, PLAUR, PTGS2, S100A9, SAA1, SCARF1, SERPING1, TNFRSF1B]                                 |
| positive regulation of response to wounding                      | GO_BiologicalProcess-GOA_09.02.2016_16h18 | 3.0E-12      | 520.0E-12                              | 74.0E-24                                | 8.09               | 14.00     | [ANXA1, C3, CCL14, CCL23, CTSS, F3, HMGB1, IL2, LBP, MAPK13, PLA2G2A, PTGS2, S100A9, SCARF1]                                                                                                                      |
| regulation of inflammatory response                              | GO_BiologicalProcess-GOA_09.02.2016_16h18 | 800.0E-15    | 140.0E-12                              | 74.0E-24                                | 5.70               | 18.00     | [ANXA1, C3, CCL14, CCL23, CMA1, CTSS, GSTP1, IL2, LBP, MAPK13, PARK7, PGLYRP1, PLA2G2A, PTGS2, S100A9, SAA1, SERPING1, TNFRSF1B]                                                                                  |
| positive regulation of inflammatory response                     | GO_BiologicalProcess-GOA_09.02.2016_16h18 | 3.9E-9       | 680.0E-9                               | 74.0E-24                                | 8.20               | 10.00     | [C3, CCL14, CCL23, CTSS, IL2, LBP, MAPK13, PLA2G2A, PTGS2, S100A9]                                                                                                                                                |
| TNF signaling pathway                                            | KEGG_10.02.2016                           | 380.0E-9     | 66.0E-6                                | 4.2E-6                                  | 7.27               | 8.00      | [CASP10, CSF1, CSF2, MAP2K1, MAPK13, MMP9, PTGS2, TNFRSF1B]                                                                                                                                                       |
| Proteoglycans in cancer                                          | KEGG_10.02.2016                           | 48.0E-9      | 8.5E-6                                 | 530.0E-9                                | 5.42               | 11.00     | [CAMK2B, CAMK2D, ITGB1, MAP2K1, MAP2K2, MAPK13, MMP9, MSN, PLAUR, PTPN11, PTPN6]                                                                                                                                  |
| positive regulation of tyrosine phosphorylation of Stat5 protein | GO_BiologicalProcess-GOA_09.02.2016_16h18 | 110.0E-9     | 20.0E-6                                | 140.0E-15                               | 25.00              | 5.00      | [CSF2, FYN, IL2, IL3, TIMP1]                                                                                                                                                                                      |
| cytokine activity                                                | GO_MolecularFunction-GOA_09.02.2016_16h18 | 1.1E-12      | 190.0E-12                              | 140.0E-15                               | 6.81               | 16.00     | [CCL14, CCL23, CSF1, CSF2, CXCL11, CXCL8, GDF5, GPI, HMGB1, IL16, IL2, IL3, NAMPT, S100A9, TIMP1, TNFSF14]                                                                                                        |
| cytokine receptor binding                                        | GO_MolecularFunction-GOA_09.02.2016_16h18 | 31.0E-9      | 5.4E-6                                 | 140.0E-15                               | 4.42               | 13.00     | [CCL14, CCL23, CSF1, CSF2, CXCL11, CXCL8, GDF5, IL2, IL3, S100A9, SHC1, TIMP1,                                                                                                                                    |

TNFSF14]

| GO Term                                                                           | Ontology Source                           | Term P Value | Term P Value Corrected with Bonferroni | Group P Value Corrected with Bonferroni | % Associated Genes | Nr. Genes | Associated Genes Found                                                                             |
|-----------------------------------------------------------------------------------|-------------------------------------------|--------------|----------------------------------------|-----------------------------------------|--------------------|-----------|----------------------------------------------------------------------------------------------------|
| peptidyl-tyrosine phosphorylation regulation of peptidyl-tyrosine phosphorylation | GO_BiologicalProcess-GOA_09.02.2016_16h18 | 5.5E-9       | 970.0E-9                               | 140.0E-15                               | 4.17               | 15.00     | [CSF2, DDR2, EPHA2, FYN, IL2, IL3, ITGB1, MAP2K1, MAP2K2, PTPN1, PTPN6, S100A9, SHC1, TIMP1, YES1] |
|                                                                                   | GO_BiologicalProcess-GOA_09.02.2016_16h18 | 210.0E-9     | 37.0E-6                                | 140.0E-15                               | 4.68               | 11.00     | [CSF2, FYN, IL2, IL3, ITGB1, PTPN1, PTPN6, S100A9, SHC1, TIMP1, YES1]                              |



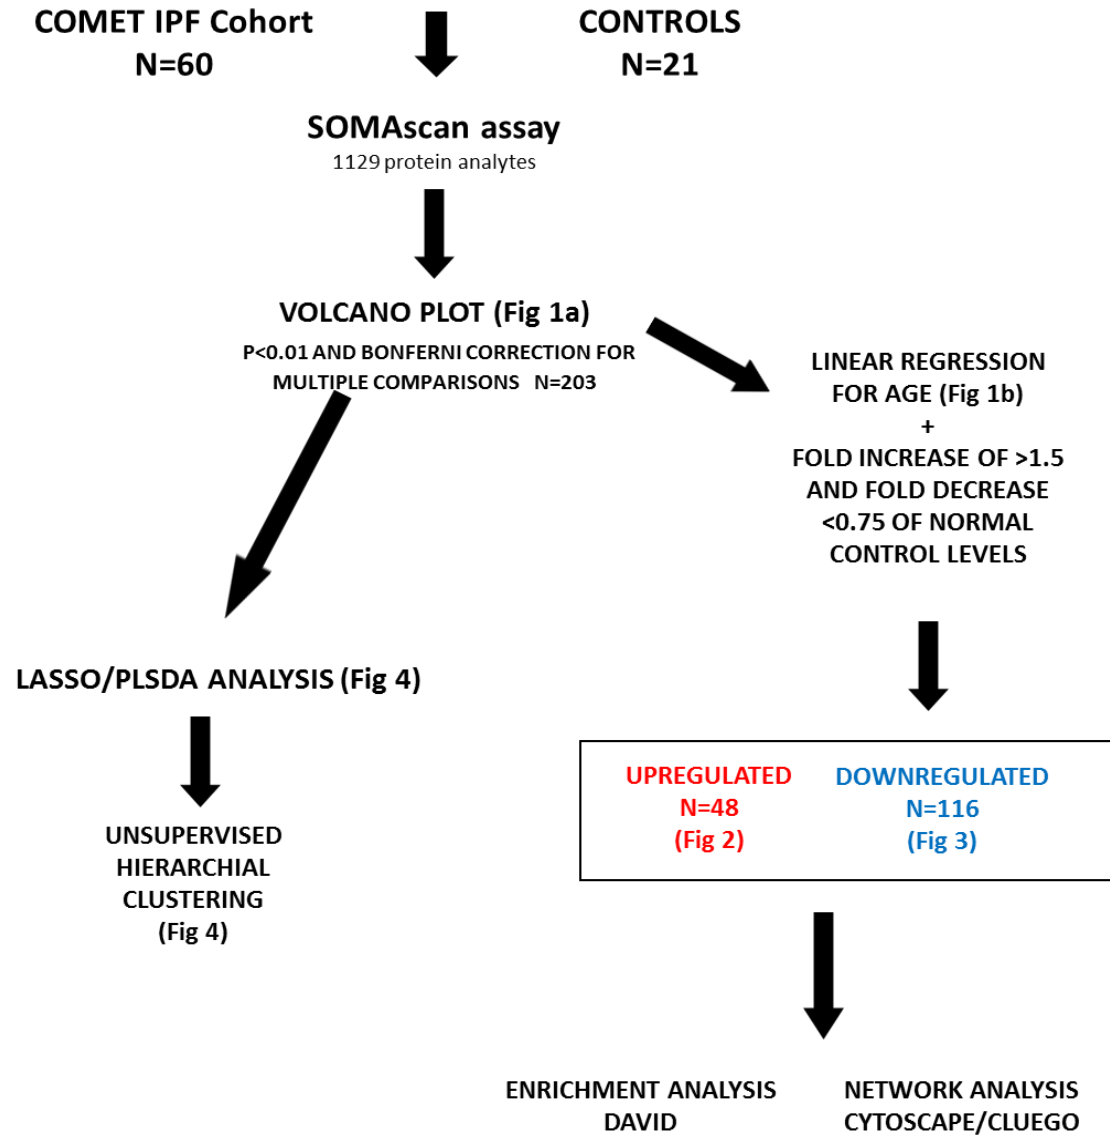

Figure S1 Schematic representation of approach adopted in this study.

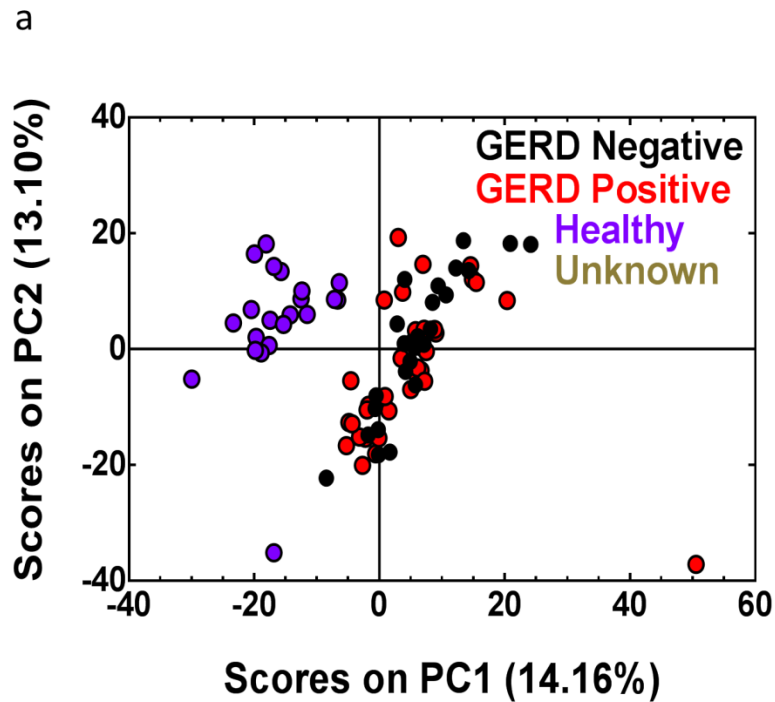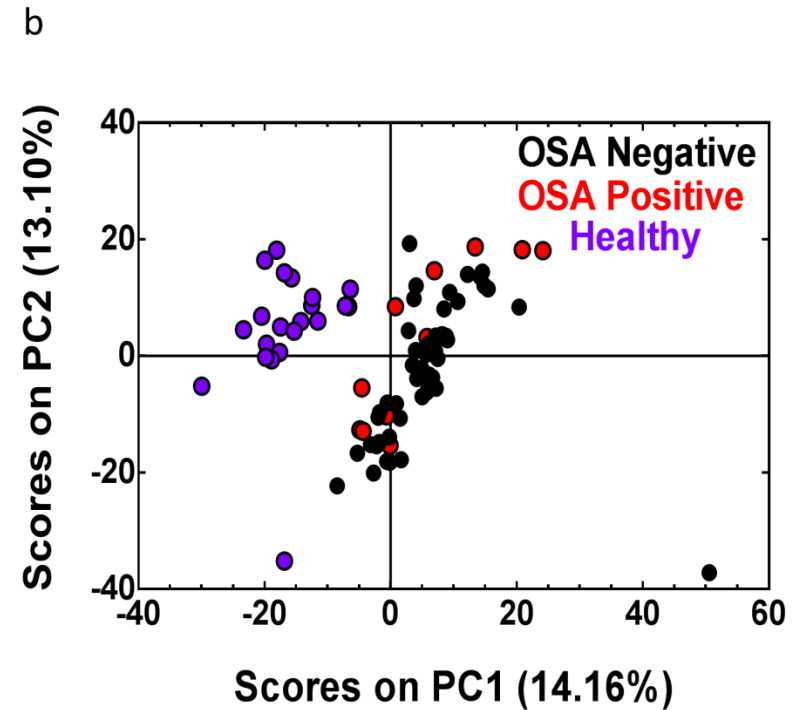

**Figure S2. Principal Component Analysis (PCA) showed that the largest, unbiased difference in the IPF-Healthy dataset is between the IPF and healthy groups, with comorbidities in the IPF patients having little effect. (a)** A PCA model based on all 1129 measured blood proteins captured 27.26% of the total variance in the data, with PC1 explaining 14.16% of the variance and PC2, 13.10%. In this model, the healthy patients score in the negative region of PC1, and the IPF patients score mostly in the positive area of PC1. IPF patients with GERD do not cluster together within the IPF group; these patients are mixed evenly with the IPF patients who do not have GERD. **(b)** Similarly, when looking at IPF patients with obstructive sleep apnea (OSA), it can be seen that these patients are spread throughout the IPF grouping in the PCA and do not form their own cluster. The main difference in this PCA model is still between the healthy and IPF patients.

|                                                      | regulation of cardiac muscle hypertrophy | platelet activation | T cell costimulation | regulation of cellular response to insulin stimulus | ErbB signaling pathway | Sphingolipid signaling pathway | VEGF signaling pathway | Complement and coagulation cascades | B cell receptor signaling pathway | Fc epsilon RI signaling pathway | Fc gamma R-mediated phagocytosis | Thyroid hormone signaling pathway | AGE-RAGE signaling pathway in diabetic complications | Bacterial invasion of epithelial cells |
|------------------------------------------------------|------------------------------------------|---------------------|----------------------|-----------------------------------------------------|------------------------|--------------------------------|------------------------|-------------------------------------|-----------------------------------|---------------------------------|----------------------------------|-----------------------------------|------------------------------------------------------|----------------------------------------|
| regulation of cardiac muscle hypertrophy             | 1.00                                     | -0.23               | -0.27                | 0.26                                                | 0.14                   | -0.04                          | -0.11                  | -0.24                               | -0.04                             | -0.04                           | -0.04                            | 0.19                              | -0.04                                                | -0.24                                  |
| platelet activation                                  | -0.23                                    | 1.00                | 0.31                 | 0.23                                                | 0.23                   | 0.31                           | 0.31                   | -0.23                               | 0.15                              | 0.15                            | 0.31                             | 0.31                              | 0.46                                                 | 0.38                                   |
| T cell costimulation                                 | -0.27                                    | 0.31                | 1.00                 | 0.19                                                | 0.28                   | 0.35                           | 0.42                   | -0.27                               | 0.35                              | 0.35                            | 0.35                             | 0.35                              | 0.35                                                 | 0.65                                   |
| regulation of cellular response to insulin stimulus  | 0.26                                     | 0.23                | 0.19                 | 1.00                                                | 0.57                   | 0.42                           | 0.50                   | -0.24                               | 0.19                              | 0.19                            | 0.42                             | 0.65                              | 0.42                                                 | 0.26                                   |
| ErbB signaling pathway                               | 0.14                                     | 0.23                | 0.28                 | 0.57                                                | 1.00                   | 0.49                           | 0.53                   | -0.29                               | 0.49                              | 0.49                            | 0.49                             | 0.90                              | 0.49                                                 | 0.36                                   |
| Sphingolipid signaling pathway                       | -0.04                                    | 0.31                | 0.35                 | 0.42                                                | 0.49                   | 1.00                           | 0.81                   | -0.27                               | 0.57                              | 0.57                            | 1.00                             | 0.57                              | 0.78                                                 | 0.42                                   |
| VEGF signaling pathway                               | -0.11                                    | 0.31                | 0.42                 | 0.50                                                | 0.53                   | 0.81                           | 1.00                   | -0.31                               | 0.42                              | 0.42                            | 0.81                             | 0.61                              | 0.61                                                 | 0.50                                   |
| Complement and coagulation cascades                  | -0.24                                    | -0.23               | -0.27                | -0.24                                               | -0.29                  | -0.27                          | -0.31                  | 1.00                                | -0.27                             | -0.27                           | -0.27                            | -0.27                             | -0.27                                                | -0.24                                  |
| B cell receptor signaling pathway                    | -0.04                                    | 0.15                | 0.35                 | 0.19                                                | 0.49                   | 0.57                           | 0.42                   | -0.27                               | 1.00                              | 0.57                            | 0.57                             | 0.57                              | 0.57                                                 | 0.42                                   |
| Fc epsilon RI signaling pathway                      | -0.04                                    | 0.15                | 0.35                 | 0.19                                                | 0.49                   | 0.57                           | 0.42                   | -0.27                               | 0.57                              | 1.00                            | 0.57                             | 0.35                              | 0.57                                                 | 0.42                                   |
| Fc gamma R-mediated phagocytosis                     | -0.04                                    | 0.31                | 0.35                 | 0.42                                                | 0.49                   | 1.00                           | 0.81                   | -0.27                               | 0.57                              | 0.57                            | 1.00                             | 0.57                              | 0.78                                                 | 0.42                                   |
| Thyroid hormone signaling pathway                    | 0.19                                     | 0.31                | 0.35                 | 0.65                                                | 0.90                   | 0.57                           | 0.61                   | -0.27                               | 0.57                              | 0.35                            | 0.57                             | 1.00                              | 0.57                                                 | 0.42                                   |
| AGE-RAGE signaling pathway in diabetic complications | -0.04                                    | 0.46                | 0.35                 | 0.42                                                | 0.49                   | 0.78                           | 0.61                   | -0.27                               | 0.57                              | 0.57                            | 0.78                             | 0.57                              | 1.00                                                 | 0.65                                   |
| Bacterial invasion of epithelial cells               | -0.24                                    | 0.38                | 0.65                 | 0.26                                                | 0.36                   | 0.42                           | 0.50                   | -0.24                               | 0.42                              | 0.42                            | 0.42                             | 0.42                              | 0.65                                                 | 1.00                                   |

**Figure S3** Kappa statistics from the upregulated proteome. Level of agreement between gene terms is measured by Kappa statistics (default <4). Red scale depicts level of agreement from very high (1) to very low (-1).

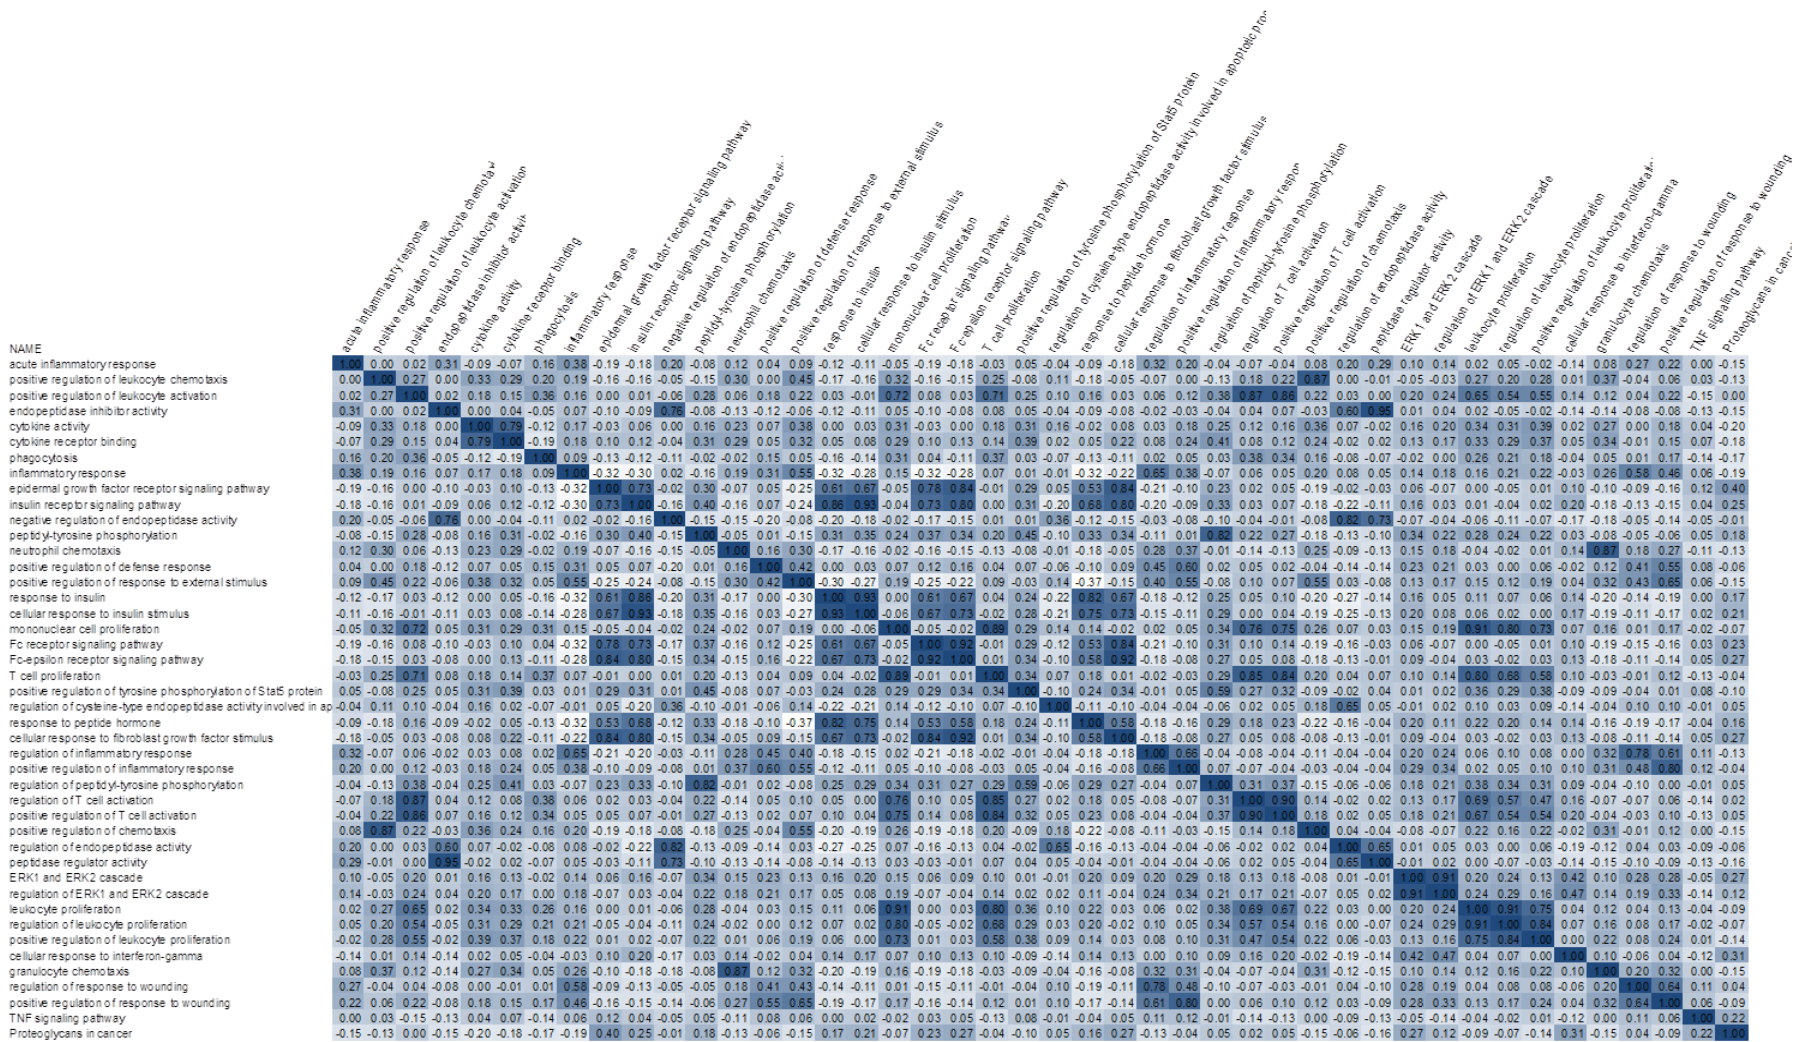

**Figure S4** Kappa statistics from the downregulated proteome. Level of agreement between gene terms is measured by Kappa statistics( default <4). Red scale depicts level of agreement from very high (1) to very low (-1).

Figure S5

DAVID analysis by GO Biological Process of the 8 protein identified LASSO signature

|  | P13 | C3 | SERPINA5 | TNFSF14 | GSK3B | GSK3A |                                           | P Value |
|--|-----|----|----------|---------|-------|-------|-------------------------------------------|---------|
|  |     |    |          |         |       |       | negative regulation of catalytic activity | 0.0246  |
|  |     |    |          |         |       |       | peptidase inhibitor activity              | 0.0095  |
|  |     |    |          |         |       |       | endopeptidase regulator activity          | 0.009   |
|  |     |    |          |         |       |       | peptidase regulator activity              | 0.0164  |
|  |     |    |          |         |       |       | endopeptidase inhibitor activity          | 0.0082  |
